1 **Natural strain diversity reveals novel biofilm regulation in squid-colonizing *Vibrio fischeri***

2

3

4 Ella R. Rotman<sup>1,†</sup>, Katherine M. Bultman<sup>2,†</sup>, John F. Brooks II<sup>1,4</sup>, Mattias C. Gyllborg<sup>1</sup>, Hector L.  
5 Burgos<sup>2</sup>, Michael S. Wollenberg<sup>3</sup>, Mark J. Mandel<sup>1,2,\*</sup>

6

7

8 <sup>1</sup> Department of Microbiology-Immunology, Northwestern University Feinberg School of  
9 Medicine, Chicago, IL USA

10

11 <sup>2</sup> Department of Medical Microbiology and Immunology, University of Wisconsin-Madison,  
12 Madison, WI USA

13

14 <sup>3</sup> Department of Biology, Kalamazoo College, Kalamazoo, MI USA

15

16 <sup>4</sup> Current address: Department of Immunology, The University of Texas Southwestern Medical  
17 Center, Dallas, TX USA

18

19 † Authors contributed equally

20

21

22 Short title: *Vibrio fischeri* biofilm regulatory evolution

23

24 Keywords: Biofilm, phosphorelay, RscS, BinK, *Vibrio fischeri*, *Aliivibrio fischeri*

25

26

27 \* Correspondence to:

28

29 Mark J. Mandel

30 University of Wisconsin-Madison

31 Department of Medical Microbiology and Immunology

32 1550 Linden Drive

33 Madison, WI 53706

34 Phone: (608) 261-1170

35 Fax: (608) 262-8418

36 Email: mmandel@wisc.edu

37

38

39

40

41

42 **ABSTRACT**

43

44 The mutualistic symbiont *Vibrio fischeri* builds a symbiotic biofilm during colonization of squid  
45 hosts. Regulation of the exopolysaccharide component, termed Syp, has been examined in  
46 strain ES114, where production is controlled by a phosphorelay that includes the inner  
47 membrane hybrid histidine kinase RscS. Most strains that lack RscS or encode divergent RscS  
48 proteins cannot colonize the squid host unless RscS from a squid symbiont is heterologously  
49 expressed. In this study, we examine *V. fischeri* isolates worldwide to understand the landscape  
50 of biofilm regulation during beneficial colonization. We provide a detailed study of three distinct  
51 evolutionary groups of *V. fischeri* and find that while the RscS-Syp biofilm pathway is required in  
52 one of the groups, two other groups of squid symbionts require Syp independent of RscS.  
53 Mediterranean squid symbionts, including *V. fischeri* SR5, colonize without an RscS homolog  
54 encoded in their genome. Additionally, Group A *V. fischeri* strains, which form a tightly-related  
55 clade of Hawaii isolates, have a frameshift in *rscS* and do not require the gene for squid  
56 colonization or competitive fitness. These same strains have a frameshift in *sypE*, and we  
57 provide evidence that this Group A *sypE* allele leads to an upregulation in biofilm activity. This  
58 work thus describes the central importance of Syp biofilm in colonization of diverse isolates, and  
59 demonstrates that significant evolutionary transitions correspond to regulatory changes in the  
60 *syp* pathway.

61

62 **IMPORTANCE**

63

64 Biofilms are surface-associated, matrix-encased bacterial aggregates that exhibit enhanced  
65 protection to antimicrobial agents. Biofilms are prevalent in environmental, beneficial, and  
66 pathogenic interactions, though their role in beneficial colonization has been understudied.  
67 Previous work has established the importance of biofilm formation by a strain of luminous *Vibrio*

68 *fischeri* bacteria as the bacteria colonize their host, the Hawaiian bobtail squid. In this study,  
69 expansion of this work to many natural isolates revealed that biofilm genes are universally  
70 required, yet there has been a shuffling of the regulators of those genes. This work provides  
71 evidence that even when bacterial behaviors are conserved, dynamic regulation of those  
72 behaviors can underlie evolution of the host colonization phenotype. Furthermore, this work  
73 emphasizes the importance of investigating natural diversity as we seek to understand  
74 molecular mechanisms in bacteria.

75

## 76 **INTRODUCTION**

77

78 A fundamental question in studying host-associated bacterial communities is understanding how  
79 specific microbial taxa assemble reproducibly in their host. Key insights into these processes  
80 were first obtained by studying plant-associated microbes, and the discovery and  
81 characterization of Nod factors in Rhizobia was valuable to understand how partner choice  
82 between microbe and host could be mediated at the molecular level (1, 2). There are complex  
83 communities in humans and other vertebrate animals, yet metagenomic and imaging analyses  
84 of these communities have revealed striking reproducibility in the taxa present and in the spatial  
85 arrangement of those taxa (3–5). Invertebrate animal microbiomes provide appealing systems in  
86 which to study microbiome assembly in an animal host: the number of taxa are relatively small,  
87 and examination and manipulation of these organisms have yielded abundant information about  
88 processes underlying host colonization (6). For this work we focused on the binary symbiosis  
89 between *Vibrio fischeri* and bobtail squids, including the Hawaiian bobtail squid, *Euprymna*  
90 *scolopes*. Bobtail squid have an organ for the symbiont termed the light organ, and passage of  
91 specific molecules between the newly-hatched host and the symbiont leads to light organ  
92 colonization specifically by planktonic *V. fischeri* and not by other bacteria (7–9). The  
93 colonization process involves initiation, accommodation, and persistence steps, resulting in light

94 organ crypt colonization by *V. fischeri*. Upon colonization of the squid light organ, bacteria  
95 accumulate to high density and produce light. The bacterial light is modulated by the host to  
96 camouflage the moonlight shadow produced by the nighttime foraging squid in a cloaking  
97 process termed counter-illumination (10, 11). A diel rhythm leads to a daily clearing of 90-95%  
98 of the bacteria from the crypts and regrowth of the remaining cells (12). However, the initial  
99 colonization process, including biofilm-based aggregation on the host ciliated appendages,  
100 occurs only in newly-hatched squid. This work examines regulation of biofilm formation in  
101 diverse squid-colonizing *V. fischeri* strains.

102

103 In the well-studied *V. fischeri* strain ES114, biofilm formation is required to gain entry into the  
104 squid host. RscS is a hybrid histidine kinase that regulates *V. fischeri* biofilm formation through  
105 a phosphorelay involving the hybrid histidine kinase SypF and the response regulator and  $\sigma^{54}$ -  
106 dependent activator SypG (13–15). This pathway regulates transcription of the symbiosis  
107 polysaccharide (*Syp*) locus, which encodes regulatory proteins (*SypA*, *SypE*, *SypF*, and *SypG*),  
108 glycosyltransferases, factors involved in polysaccharide export, and other biofilm-associated  
109 factors (14, 16). The products of the ES114 *syp* locus direct synthesis and export of a biofilm  
110 exopolysaccharide that is critical for colonization. Additional pathways have been identified to  
111 influence biofilm regulation in ES114, including the *SypE*-*SypA* pathway and inhibition of biofilm  
112 formation by *BinK* and *HahK* (17–21).

113

114 *V. fischeri* biofilm regulation is connected to host colonization specificity. In the Pacific Ocean,  
115 the presence of *rscS* DNA is strongly correlated to the ability to colonize squid (22). As one  
116 example, while the fish symbiont MJ11 encodes a complete *syp* locus, it lacks *RscS* and does  
117 not robustly colonize squid. Heterologous expression of ES114 *RscS* in MJ11 activates the  
118 biofilm pathway and is sufficient to enable squid colonization (22). Similarly, addition of ES114  
119 *RscS* to *mjapo.8.1*--a fish symbiont that encodes a divergent *RscS* that is not functional for

120 squid colonization--allows the strain to colonize squid (22). RscS has also been shown to be  
121 necessary for squid colonization. In addition to ES114, interruption of *rscS* in *V. fischeri* strains  
122 KB1A97 and MJ12 renders them unable to colonize squid. Previous phylogenetic analysis  
123 revealed that ancestral *V. fischeri* do not encode *rscS*, and that it was acquired once during the  
124 organism's evolution, likely allowing for an expansion in host range. From this analysis, it was  
125 concluded that strains with *rscS* can colonize squid, with the only exception being the fish  
126 symbionts that harbor the divergent RscS, including *mjapo.8.1* (22).

127

128 There are similar *Vibrio*-squid associations worldwide, yet only *V. fischeri* and the closely-  
129 related *Vibrio logei* have been isolated from light organs (23–26). Our 2009 study revealed that  
130 although most symbionts have *rscS* DNA, there are Mediterranean *V. fischeri* (e.g., SR5) that  
131 do not have *rscS* yet can colonize squid (22, 24, 27). This unexpected finding prompted the  
132 current work to examine whether strains such as SR5 colonize with the known biofilm pathway  
133 or with a novel pathway. Here, we show that all *V. fischeri* strains tested require the Syp biofilm  
134 to colonize a squid host, and we identify two groups of isolates that colonize with novel  
135 regulation. Given the exquisite specificity by which *V. fischeri* bacteria colonize squid hosts, this  
136 work reinforces the importance of biofilm formation and reveals different regulatory modes  
137 across the evolutionary tree.

138

## 139 **RESULTS**

140

141 **Most *V. fischeri* strains synthesize biofilm in response to RscS overexpression.** Biofilm  
142 formation is required for squid colonization, and overexpression of the biofilm regulator RscS in  
143 strain ES114 stimulates a colony biofilm on agar plates (15). Our previous work demonstrated  
144 that *V. fischeri* strain MJ11 synthesizes a colony biofilm under similar inducing conditions, which  
145 is notable because MJ11 does not encode RscS in its chromosome (22). While the ancestral

146 strain MJ11 did not encode RscS, it had what seemed to be an intact *syp* locus, and  
147 overexpression of the heterologous RscS from ES114 was sufficient to induce *syp* biofilm  
148 production and enable robust squid colonization (22). We examined a phylogenetic tree of *V.*  
149 *fischeri* isolates (Fig. 1), and in this study we expand our analysis of RscS-Syp biofilm regulation  
150 in a wider group of *V. fischeri* strains.

151  
152 Initially, we asked whether responsiveness to RscS overexpression would yield a similar colony  
153 biofilm in this diverse group of strains. We took the same approach as our previous study and  
154 introduced plasmid pKG11, which overexpressed ES114 RscS, into strains across the  
155 evolutionary tree (22, 28). We observed that almost all strains tested, including those that lack  
156 *rscS*, were responsive to overexpression of ES114 RscS (Fig. 2). The morphology of the colony  
157 biofilms differed across isolates; but in most cases colony biofilm was evident at 24 h and  
158 prominent at 48 h. All of the strains exhibited some wrinkled colony morphology at 48 h with the  
159 exception of CG101, which was isolated from the pineapplefish *Cleidopus gloriamaris* (25).  
160 These results demonstrated that most *V. fischeri* strains can produce biofilm in response to  
161 RscS overexpression, and this includes strains that have not encountered *rscS* in their  
162 evolutionary history.

163  
164 One unexpected observation was that there was a subset of *rscS*-encoding strains that were  
165 reproducibly delayed in their colony biofilm, and had only a mild wrinkled colony phenotype at  
166 48 h (strains MB11B1, ES213, KB2B1; Fig. 2). We considered whether this was due to  
167 differential growth of the strains, but resuspension of spots and dilution plating to determine  
168 CFU/spot demonstrated no significant growth difference between these strains and ES114  
169 under these conditions. The strains are closely-related (Fig. 1) and a previous study had noted  
170 that this group shared a number of phenotypic characteristics, e.g. reduced motility in soft agar  
171 (29). Those authors termed this tight clade as “Group A” *V. fischeri* (30). Our results in Figure 2

172 argue that Group A strains do not respond to RscS in the same manner as other *V. fischeri*  
173 strains, which prompted us to investigate the evolution of the RscS-Syp signaling pathway. We  
174 have maintained the Group A nomenclature here, and furthermore we introduce the  
175 nomenclature of Group B (a paraphyletic group of strains that contain *rscS*; this group includes  
176 the common ancestor of all *rscS*-containing strains) and Group C (a paraphyletic group of  
177 strains that contains the common ancestor of all *V. fischeri* - these strains do not contain *rscS*),  
178 as shown in Figure 1.

179

180 **Ancestral Group C squid isolates colonize *E. scolopes* independent of RscS.** Group C  
181 strains generally cannot colonize squid, yet there are Mediterranean squid isolates that appear  
182 in this group (Fig. 1; (22)). The best-studied of these strains, SR5, was isolated from *Sepiola*  
183 *robusta*, is highly luminous, and colonizes the Hawaiian bobtail squid *E. scolopes* (24).  
184 Nonetheless, this strain lacks *rscS* (27). We first asked whether the strain can colonize in our  
185 laboratory conditions, and we confirmed that it colonizes robustly, consistent with the result  
186 result previously published by Fidopiastis et al. (24) (Fig. 3). Next, we asked whether it uses the  
187 Syp biofilm to colonize. To address this question, we deleted the 18 kb *syp* locus (i.e., *sypA*  
188 through *sypR*) in strains SR5 and ES114. Deletion of *rscS* or the *syp* locus in ES114 led to a  
189 substantial defect in colonization, consistent with a known role for these factors (Fig. 3).  
190 Similarly, deletion of the *syp* locus in SR5, a strain that does not encode *rscS*, led to a dramatic  
191 reduction in colonization (Fig. 3). Therefore, even though strain SR5 does not encode *rscS*, it  
192 can colonize squid, and it requires the *syp* locus to colonize normally.

193

194 **RscS is dispensable for colonization in Group A strains.** We noted in the wrinkled colony  
195 biofilm assays shown in Figure 2 that Group A strains exhibited a more modest response to  
196 overexpression of RscS. Sequencing of the native *rscS* gene in these strains revealed a  
197 predicted -1 frameshift ( $\Delta A1141$ ) between the PAS domain and the histidine kinase CA domain.

198 Whereas ES114 and other Group B strains have nine adenines at this position, the Group A  
199 strains have eight, leading to a frameshift and then truncation at an amber stop codon, raising  
200 the possibility that Group A strains have a divergent biofilm signaling pathway (Fig. 4A). Given  
201 the importance of RscS in the Group B strains including ES114, we considered the possibility  
202 that this apparent frameshift encoded a functional protein, either through ribosomal  
203 frameshifting or through the production of two polypeptides that together provided RscS  
204 function; there is precedent for both of these concepts in the literature (31, 32). We first  
205 introduced a comparable frameshift into a plasmid-borne overexpression allele of ES114 *rscS*,  
206 and this allele did not function with the deletion of the single adenine (Fig. 4B). This result  
207 suggested to us that the frameshift in the Group A strains may not be functional. Therefore, we  
208 proceeded to delete *rscS* in two Group A strains (MB11B1, ES213) and two Group B strains  
209 (ES114, MB15A4). The Group B strains required RscS for squid colonization (Fig. 5A).  
210 However, the Group A strains exhibited no deficit in the absence of *rscS* DNA (Fig. 5A). We  
211 next attempted a more sensitive assay in which a Group A strain was competed against  
212 MB15A4. Previous studies have demonstrated that in many cases Group A strains outcompete  
213 what we term Group B strains (30, 33). We competed Group A strain MB11B1 against Group B  
214 strain MB15A4 and observed a significant competitive advantage for the Group A strain, as was  
215 observed previously (30). Deletion of *rscS* in the Group A strain did not affect competitive  
216 fitness, demonstrating that MB11B1 can outcompete a Group B strain even if MB11B1 lacks  
217 RscS (Fig. 5B).

218

219 **Syp biofilm genes are broadly required for squid colonization.** Given that Group A strains  
220 seemed to represent a tight phylogenetic group in which RscS was not required for colonization  
221 or competitive fitness, we next asked whether this group requires the Syp biofilm for  
222 colonization. We proceeded to delete the entire *syp* locus in two Group A and two Group B  
223 strains and to conduct single-strain colonization analysis. In each strain assayed, the *syp* locus



224 was required for full colonization, and we observed a 2-4 log reduction in CFU per animal in the  
225 absence of the *syp* genes, pointing to a critical role for Syp biofilm in these strains (Fig. 6). In  
226 Group A strain in particular, no colonization was detected in the absence of the *syp* locus.  
227  
228 **Group A strains encode an alternate allele of SypE.** It seemed curious to us that Group A  
229 strains do not encode a functional RscS and do not require *rscS* for colonization, yet in many  
230 cases Group A strains can outcompete Group B strains (e.g. MB11B1 in Fig. 5B; and Refs. (30,  
231 33)). We reasoned that if the Syp biofilm had a different regulatory architecture in Group A  
232 strains--e.g., constitutively activated or activated by a different regulatory protein--then this could  
233 explain the Syp regulation independent of RscS. Genome sequencing of SR5 and MB11B1 did  
234 not identify a unique histidine kinase that was likely to directly substitute for RscS (27, 33).  
235 Given that the *syp* locus encodes biofilm regulatory proteins, we examined *syp* conservation.  
236 We used TBLASTN with the ES114 Syp proteins as queries to determine amino acid  
237 conservation in the other *V. fischeri* Group A strain MB11B1, Group C strain SR5, and the *Vibrio*  
238 *vulnificus* type strain ATCC 27562 (34, 35). As shown in Figure 7, ES114 SypE, a response  
239 regulator and serine kinase/phosphatase that is a negative regulator of the Syp biofilm (17, 36),  
240 exhibited the lowest level of conservation among *syp* locus products. *V. vulnificus* does not  
241 encode a SypE ortholog (37), as the syntenic (but not homologous) RbdE encodes a predicted  
242 ABC transporter substrate-binding protein. The closest hit for SypE was AOT11\_RS12130 (9%  
243 identity), compared to 7% identity for the RbdE. Due to the reduced conservation at both the  
244 strain and species levels, we analyzed *V. fischeri* MB11B1 SypE in greater detail. Examination  
245 of the *sypE* coding sequence revealed an apparent -1 frameshift mutation in which the position  
246 33 (guanine in ES114 and adenine in other Group B and C strains examined) is absent in Group  
247 A strains (Fig. 7B). We therefore considered the hypothesis that SypE is nonfunctional in Group  
248 A, and that these strains can colonize because they are lacking a functional copy of this  
249 negative regulator that is itself regulated by RscS.

250

251 To test this hypothesis, we relied on knowledge of the biofilm regulatory pathway from ES114, in  
252 which overexpression of SypG produces a wrinkled colony phenotype, but only in strains lacking  
253 SypE activity (38, 39). Therefore, we introduced the SypG-overexpressing plasmid pEAH73 into  
254 strains as a measure of whether the SypE pathway was intact. In the ES114 strain background,  
255 we observed cohesive wrinkled colony formation at 48 h in an ES114  $\Delta sypE$  strain, but not in  
256 the wild-type parent (Fig. 8A). If the *sypE* frameshift observed in MB11B1 led to a loss of  
257 function, then introduction of that frameshift into ES114 would lead to a strain that is equivalent  
258 to the  $\Delta sypE$  strain. We constructed this strain and upon SypG overexpression we observed  
259 wrinkled colony formation. Surprisingly, the biofilm phenotype was observed earlier (i.e., by 24  
260 h) and leads to more defined colony biofilm architecture at 48 h. While the lack of SypE leads to  
261 increased and more rapid biofilm formation, in this assay we observed an even greater increase  
262 as a result of the frameshift in *sypE* (Fig. 8A).

263

264 We proceeded to conduct a similar assay in the MB11B1 strain background. The colony biofilm  
265 phenotypes were muted compared to the ES114 background, but the pattern observed is the  
266 same. Strains lacking the additional nucleotide at position 33 (i.e., the native MB11B1 allele)  
267 exhibited the strongest cohesion, whereas strains with the nucleotide to mimic ES114 *sypE* (i.e.,  
268 added back in MB11B1 *sypE*(nt::33G)) were not cohesive (Fig. 8B). These results argue that a  
269 novel allele of *sypE* is found in Group A strains and this allele results in more substantial biofilm  
270 formation than in a  $\Delta sypE$  strain.

271

272 Our finding that the MB11B1 *sypE* allele promotes biofilm formation bolstered the model that  
273 this allele contributes to the ability of MB11B1 to colonize squid independent of RscS. To test  
274 this model, we introduced the frameshift into ES114 or “corrected” the frameshift in MB11B1.  
275 We then conducted single-strain colonization assays, and in each case the *sypE* allele alone

276 was not sufficient to alter the overall colonization behavior of the strain (Fig. 9). Therefore, these  
277 data suggest that the frameshift in the MB11B1 *sypE* is not sufficient to explain its ability to  
278 colonize independent of RscS, and therefore other regions of SypE and/or other loci in the  
279 MB11B1 genome contribute to its ability to colonize independent of RscS.

280

281 **BinK is active in Group A and Group C strains.** We recently described the histidine kinase,  
282 BinK, which negatively regulates *syp* transcription and Syp biofilm formation (18). In ES114,  
283 overexpression of BinK impairs the ability of *V. fischeri* to colonize. We therefore reasoned that  
284 if BinK could function in Group A strains and acted similarly to repress Syp biofilm, then  
285 overexpression of BinK would reduce colonization of these strains. We introduced the pBinK  
286 plasmid (i.e., ES114 *binK* (18)) and asked whether multicopy BinK would affect colonization. In  
287 strain MB11B1, BinK overexpression led to a dramatic reduction in colonization (Fig. 10A).  
288 Therefore, there is a clear effect for BinK overexpression on the colonization of the Group A  
289 strain MB11B1.

290

291 We attempted to ask the same question in Group C strain SR5, but the pES213-origin plasmids  
292 were not retained during squid colonization. Therefore, we instead asked whether deletion of  
293 the BinK, a negative regulator of ES114 colonization, has a comparable effect in SR5 (18). We  
294 deleted *binK* and observed a 2.4-fold competitive advantage during squid competition (Fig.  
295 10B), arguing that BinK in this Group C strain is active and performs an inhibitory function  
296 similar to that in ES114.

297

298 We next examined the colony biofilm phenotype for strains lacking BinK. MB11B1  $\Delta binK$   
299 exhibited a mild colony biofilm phenotype at 48 h, as evidenced by the cohesiveness of the spot  
300 when disrupted with a toothpick (Fig. 10C). The colonies also exhibited an opaque phenotype.  
301 In a minority of experimental replicates, wrinkled colony morphology was evident at 48 h, but in

302 all samples wrinkled colony morphology was visible at 7 d (data not shown). The SR5  $\Delta binK$   
303 strain also exhibited slightly elevated biofilm morphology at 48 h, though the cells were not as  
304 cohesive as those of MB11B1  $\Delta binK$  (Fig. 10C). Together, the results in Figure 7 argue that  
305 BinK, a factor that has been characterized as a negative regulator of Syp biofilm, plays similar  
306 roles in Group A and Group C strains and has a widely-conserved function across the *V. fischeri*  
307 evolutionary tree.

308

## 309 **DISCUSSION**

310

311 This study examines regulation of a beneficial biofilm that is critical to host colonization  
312 specificity in *V. fischeri*. The Syp biofilm was discovered thirteen years ago and has been  
313 characterized extensively for its role in facilitating squid colonization by *V. fischeri*. This work  
314 establishes that the *syp* locus is required broadly across squid symbionts, and it uncovers three  
315 groups of *V. fischeri* that use different regulatory programs upstream of the *syp* locus. A  
316 simplified phylogenetic tree showing key features of squid symbionts in these three groups is  
317 shown in Figure 11.

318

319 There are three nested evolutionary groups of *V. fischeri* that have been described separately in  
320 the literature and here we formalize the nomenclature of Groups C, B, and A. Group A is a  
321 monophyletic group, as are Groups AB and ABC (Fig. 1). This work provides evidence that  
322 squid symbionts in each group have a distinct biofilm regulatory architecture. Most *V. fischeri*  
323 isolates that have been examined from the ancestral Group C cannot colonize squid; however,  
324 those that can colonize do so without the canonical biofilm regulator RscS. We show that the  
325 known targets of RscS regulation—genes in the *syp* biofilm locus—are nonetheless required for  
326 squid colonization by this group. Group B strains include the well-characterized ES114 strain,  
327 which requires RscS and the *syp* locus to colonize squid. Group A strains differ phenotypically

328 and behaviorally from the sister Group B strains (30), and we demonstrate that these strains  
329 have altered biofilm regulation. Group A strains have a frameshift in *rscS* that renders it  
330 nonfunctional, and a 1 bp deletion in *sypE*, and we provide evidence that the *sypE* allele  
331 promotes biofilm development in the absence of RscS. Additionally, we note that the *sypE*  
332 frameshift is not present in SR5, arguing for distinct modes of biofilm regulation in Groups A, B,  
333 and C.

334

335 At the same time, this study provides evidence that some aspects of biofilm regulation are  
336 conserved in diverse squid symbionts, such as the effects of the strong biofilm negative  
337 regulator BinK. Published data indicate that evolved BinK alleles can alter colonization of H905  
338 (Group B) and MJ11 (Group C), and that a deletion of MJ11 *binK* leads to enhanced  
339 colonization (20). Our experiments in Figure 10 show a clear effect for BinK in all three  
340 phylogenetic groups. We also observed responsiveness to RscS overexpression in all squid  
341 symbionts examined (Fig. 2). CG101 was the only *V. fischeri* strain examined that did not exhibit  
342 a colony biofilm in response to RscS overexpression. CG101 was isolated from the Australian  
343 fish *Cleidopus gloriamaris*; based on these findings, we suspect that the strain does not have an  
344 intact *syp* locus or otherwise has divergent biofilm regulation.

345

346 It remains a formal possibility that the entire *syp* locus is not required in Group A or Group C,  
347 but instead that only one or a subset of genes in the locus are needed. We have constructed  
348 Campbell-type (insertion duplication) alleles to interrupt *sypG* in MB11B1 and SR5, and  
349 additionally have isolated a transposon insertion in SR5 *sypJ*, and none were able to colonize  
350 well. Additionally, aggregation in squid mucus has been observed for the Group A strain  
351 MB13B2, and this aggregation is dependent on *sypQ* (40). In our data we note that Group A  
352 strains were completely unable to colonize in the absence of the *syp* locus, unlike the tested  
353 Group B & C strains that exhibited reduced colonization in their respective mutants (Figs. 3, 6).

354 Therefore, the simplest explanation is that the *syp* locus is required in divergent strains in a  
355 manner similar to how it is used in ES114. We think that the ability to completely delete the *syp*  
356 locus is a clean way to ask whether the locus is required for specific phenotypes, and our  
357 strains are likely to be useful tools in probing Syp protein function in diverse *V. fischeri* isolates.

358

359 It is intriguing to speculate as to how the two frameshifts in the Group A strains arose, and why  
360 the nonfunctional RscS is tolerated in this group. One possible scenario is that the Group A  
361 strains acquired a new regulatory input into the Syp pathway, and that the presence of this new  
362 regulator bypassed the requirement for RscS. This is supported by comparative genomic  
363 analysis of Hawaiian D (dominant)-type strains--which largely overlap with Group A--that  
364 demonstrated an additional 250 kb of genomic DNA compared to other isolates (33). A related  
365 possibility is that *rscS*-independent colonization results from altered regulation of the *syp* locus,  
366 either due to changes in regulators (e.g. SypF) or sites that are conserved with Group B. An  
367 additional possibility is that the *sypE* frameshift arose, enabling Group A strains to colonize  
368 independent of *rscS*. Given that correction of this frameshift in MB11B1 does not significantly  
369 affect colonization ability (Fig. 9), this sequence seems less likely, and we expect that another  
370 regulator in MB11B1 is required for the RscS-independent colonization phenotype. There is  
371 evidence that under some conditions LuxU can regulate the *syp* biofilm (41), and as this protein  
372 is conserved in *V. fischeri* it may play an important role in Group A or Group C.

373

374 Results from two experimental conditions suggest that the Group A strains may have an  
375 elevated baseline level of biofilm formation. Our data indicate that in the absence of BinK or  
376 upon SypG overexpression, MB11B1 colonies exhibit strong cohesion under conditions in which  
377 ES114 does not (Figs. 8, 10). Furthermore, we note that the Group A strain MB11B1, when  
378 lacking BinK, also exhibits a darker, or more opaque, colony phenotype (Fig. 10). This  
379 phenotype has been observed in some ES114 mutants (16) but not in the corresponding ES114

380 *ΔbinK* strain (Fig. 10). The entire colonization lifecycle likely requires a balance between biofilm  
381 formation/cohesion and biofilm dispersal, and these data argue that Group A strains may be  
382 more strongly tilted toward the biofilm-producing state. There is evidence that strains lacking  
383 BinK exhibit a colonization advantage in the laboratory (18, 20), suggesting that this strategy of  
384 more readily forming biofilms may provide a fitness advantage in nature. At the same time, the  
385 biofilm negative regulator BinK is conserved among *V. fischeri* strains examined (including  
386 MB11B1; Fig. 10), arguing that there is a benefit to reducing biofilm formation under some  
387 conditions.

388  
389 Our study provides hints as to the role of SypE in MB11B1 and other Group A strains. In ES114,  
390 the C-terminus is a PP2C serine kinase domain, whereas the N-terminus of SypE is an RsbW  
391 serine phosphatase domain. SypE acts to phosphorylate and dephosphorylate SypA Ser-56,  
392 with the unphosphorylated SypA being the active form to promote biofilm development (17). The  
393 balance between SypE kinase and phosphatase is modulated by a central two-component  
394 receiver domain (17). Our data that the MB11B1 *sypE* allele promotes biofilm formation suggest  
395 that the protein is tilted toward the phosphatase activity. In MB11B1, the frameshift early in *sypE*  
396 suggests that there is a different start codon and therefore a later start codon. An alternate GTG  
397 start codon in MB11B1 occurs corresponding to codon 18 in ES114 *sypE* (Fig. 7), and this is  
398 likely the earliest start for the MB11B1 polypeptide. We attempted to directly identify the SypE  
399 N-terminus by mass spectrometry, yet we could not identify the protein from either strain.  
400 Additional study is required to elucidate how MB11B1 SypE acts to promote biofilm formation.

401  
402 *V. fischeri* strains are valuable symbionts in which to probe the molecular basis to host  
403 colonization specificity in animals (22, 25, 26). A paradigm has emerged in which biofilm  
404 formation through the RscS-Syp pathway is required for squid colonization but not for fish  
405 colonization. This study affirms a role of the Syp biofilm, but at the same time points out

406 divergent (RscS-independent) regulation in Group C and Group A isolates. In another well-  
407 studied example of symbiotic specificity, Rhizobial Nod factors are key to generating specificity  
408 with the plant host, yet strains have been identified that do not use this canonical pathway (42,  
409 43). Future work will elaborate on these RscS-independent pathways to determine how non-  
410 canonical squid colonization occurs in diverse natural isolates.

411

## 412 **MATERIALS & METHODS**

413

414 **Bacterial strains and growth conditions.** *V. fischeri* and *E. coli* strains used in this study can  
415 be found in Table 1. *E. coli* strains, used for cloning and conjugation, were grown in Luria-  
416 Bertani (LB) medium (25 g Difco LB Broth [BD] per liter). *V. fischeri* strains were grown in Luria-  
417 Bertani salt (LBS) medium (25 g Difco LB Broth [BD], 10 g NaCl, and 50 ml 1 M Tris buffer pH  
418 7.0, per liter). Growth media were solidified by adding 15 g Bacto agar (BD) per liter. When  
419 necessary, antibiotics (Gold Biotechnology) were added at the following concentrations:  
420 tetracycline, 5 µg/ml for *V. fischeri*; erythromycin, 5 µg/ml for *V. fischeri*; kanamycin, 50 µg/ml for  
421 *E. coli* and 100 µg/ml for *V. fischeri*; and chloramphenicol, 25 µg/ml for *E. coli*, 2.5 -5 µg/ml for  
422 Group B *V. fischeri*, and 1 - 2.5 µg/ml for Group A *V. fischeri*. The two MB11B1 / pKV69 strains  
423 listed reflect two separate constructions of this strain, though we have not identified any  
424 differences between them.

425

426 **Phylogenetic analysis.** Phylogenetic reconstructions assuming a tree-like topology were  
427 created with three methods: maximum parsimony (MP); maximum likelihood (ML); and  
428 Bayesian inference (Bayes) as previously described (22, 30). Briefly, MP reconstructions were  
429 performed by treating gaps as missing, searching heuristically using random addition, tree-  
430 bisection reconnection with a maximum of 8 for swaps, and swapping on best only with 1000  
431 repetitions. For ML and Bayesian analyses, likelihood scores of 1500+ potential evolutionary



432 models were evaluated using both the corrected and uncorrected Akaike Information Criterion,  
433 the Bayesian Information Criterion, and Decision Theory (Performance Based Selection) as  
434 implemented by jModelTest2.1 (44). For all information criteria, the most optimal evolutionary  
435 model was a symmetric model with a proportion of invariable sites and a gamma distribution of  
436 rate heterogeneity (SYM+I+ $\Gamma$ ).

437  
438 ML reconstruction was implemented via PAUP\*4.0a163 (45) by treating gaps as missing,  
439 searching heuristically using random addition, tree-bisection reconnection for swaps, and  
440 swapping on best only with 1000 repetitions. Bayesian inference was done by invoking the  
441 'nst=6' and 'rates=invgamma' and 'statefreqpr=fixed(equal)' settings in the software package  
442 MrBayes3.2.6 (46). The Metropolis-coupled Markov chain Monte Carlo (MCMCMC) algorithm  
443 used to estimate the posterior probability distribution for the sequences was set up with  
444 'temp=0.2' and one incrementally 'heated' chain with three 'cold' chains; these four chains were  
445 replicated two times per analysis to establish convergence of the Markov chains (i.e.,  
446 'stationarity' as defined by (47) and interpreted previously in (30)). For this work, stationarity was  
447 achieved after approximately 50,000 samples (5,000,000 generations) were collected, with 25%  
448 discarded. The ~37,500 samples included were used to construct a 50% majority-rule  
449 consensus tree from the sample distribution generated by MCMCMC and assess clades'  
450 posterior probabilities. For ML and MP analyses, the statistical confidence in the topology of  
451 each reconstruction was assessed using 1000 bootstrap replicates. Phylogenetic trees were  
452 visualized with FigTree 1.4.3 (<http://tree.bio.ed.ac.uk/software/figtree>); the final tree was edited  
453 for publication with Inkscape 0.91 (<http://inkscape.org/>) and GIMP 2.8.22 (<http://www.gimp.org/>).

454  
455 **DNA synthesis and sequencing.** Each of the primers listed in Table 3 was synthesized by  
456 Integrated DNA Technologies (Coralville, IA). Full inserts from all cloned constructs were  
457 verified by Sanger DNA sequencing through ACGT, Inc via the Northwestern University

458 Feinberg School of Medicine NUSeq Core Facility; or the University of Wisconsin-Madison  
459 Biotechnology Center. Sequence data was analyzed with SeqMan Pro (DNASTar software),  
460 SnapGene (GSL Biotech), and Benchling.

461

462 **Construction of gene deletions.** Deletions in *V. fischeri* strains ES114 and MB11B1 were  
463 made according to the lab's gene deletion protocol: doi:10.5281/zenodo.1470836. In brief, 1.6  
464 kb upstream and 1.6 kb downstream of the targeted gene or locus were cloned into linearized  
465 plasmid pEVS79 (amplified with primers pEVS79\_rev\_690/pEVS79\_for\_691) using Gibson  
466 Assembly (NEBuilder HiFi DNA Assembly cloning kit) with the primer combinations listed in  
467 Table S1. The Gibson mix, linking together the upstream and downstream flanking regions, was  
468 transformed into *E. coli* on plates containing X-gal, with several white colonies selected for  
469 further screening by PCR using primers flanking the upstream/downstream junction (Tables 3  
470 and S1). The resulting plasmid candidate was confirmed by sequencing and conjugated into the  
471 *V. fischeri* recipient by tri-parental mating with helper plasmid pEVS104, selecting for the  
472 chloramphenicol resistance of the plasmid backbone. *V. fischeri* colonies were first screened for  
473 single recombination into the chromosome by maintaining antibiotic resistance in the absence of  
474 selection and then screened for double recombination by the loss of both the antibiotic resistant  
475 cassette and the gene/locus of interest. Constructs were verified by PCR (Table 3) and  
476 sequencing.

477

478 Deletion of SR5 *binK* was conducted using Splicing by Overlap Extension PCR (SOE-PCR) and  
479 natural transformation (method modified from (48)). Oligos binK-F1 and binK-R1-LUH, and  
480 oligos binK-F2-RUH and binK-R2 were used in a PCR with MJM1125 (SR5) genomic DNA as  
481 the template to amplify DNA fragments containing ~1 kb of sequence upstream and  
482 downstream relative to *binK*, respectively. Using SOE-PCR, these fragments were fused on  
483 either side to a third DNA fragment containing an *Erm*<sup>R</sup> cassette, which was amplified using

484 pHB1 as template and oligos HB41 and HB42. We then used natural transformation with  
485 pLostfoX (49) to insert this mutagenic DNA into MJM1125, where the flanking sequences guide  
486 the Erm<sup>R</sup> cassette to replace *binK*, generating the desired gene deletion. Candidate SR5  $\Delta binK$   
487 mutants were selected after growth on LBS-Erm5 plates. Oligos binK-F1 and binK-R2, and HB8  
488 and binK-FO were used to screen candidates for the correct deletion scar by PCR, and oligos  
489 KMB\_036 and KMB\_037 were used to confirm the absence of *binK* in the genome. The deletion  
490 was verified by Sanger sequencing with primers HB8, HB9, HB42, and HB146. The base  
491 plasmid pHB1 contains an erythromycin resistance cassette flanked by FRT sites, and was  
492 constructed using oligos HB23 and HB39 with gBlock gHB1 (sequence in Supplementary File  
493 S1; Integrated DNA Technologies, Inc.) as template to amplify the Erm<sup>R</sup> cassette flanked by  
494 HindIII and BamHI sites, which was then cloned into the corresponding site in pUC19.

495

496 For most constructs, the deleted genetic material was between the start codon and last six  
497 amino acids (50), with two exceptions: the  $\Delta sypE$  in MJM1130 included the ATG that is two  
498 amino acids upstream of the predicted start codon, but not the canonical start codon; and the  
499  $\Delta binK$  alleles in MJM1117, MJM1130, and MJM2114, which were constructed to be equivalent  
500 to MJM2251 ( $\Delta binK$  in ES114) (18). The  $\Delta binK$  alleles in these strains include the start codon,  
501 the next six codons, two codons resulting from ATCGAT (ClaI site), and the last three codons  
502 for a predicted 12 amino acid peptide.

503

504 **Construction of *sypE* alleles.** To create *sypE*(ntG33 $\Delta$ ) in MJM1100 and *sypE*(nt33::G) in  
505 MJM1130, the single point mutation was created by amplifying the gene in two halves, with the  
506 N-terminal portion consisting of approximately 300 bp upstream of *sypE* up through nucleotide  
507 33 and the C-terminal portion consisting of nucleotide 33 and the remaining *sypE* gene. The  
508 overlap between the two halves contained the single nucleotide polymorphism in the primers  
509 that connected them. The altered *sypE* alleles were initially cloned into plasmid pEVS107

510 (linearized with primers pEVS107\_3837/pEVS107\_3838) using Gibson Assembly and then the  
511 entire altered *sypE* allele was subcloned into pEVS79 with Gibson Assembly (Table S1). After  
512 double recombination of the vector into *V. fischeri*, candidate colonies for the altered *sypE* in  
513 MJM1100 were screened with primers ES114\_indel\_for/ES114\_indel\_rev. The primer set  
514 anneals more strongly to the wildtype *sypE* sequence than to *sypE*(ntG33::Δ). Candidates in the  
515 MJM1100 background with a fainter PCR band were sequenced and confirmed to have the  
516 *sypE*(ntG33::Δ) allele. For MJM1130, the primer set MB11B1\_indel\_for/MB11B1\_indel\_rev  
517 anneals more strongly to the *sypE*(nt33::G) allele than to the naturally occurring *sypE* allele and  
518 candidates in MJM1130 that contained a more robust PCR band were selected for sequencing  
519 to be confirmed as being *sypE*(nt33::G).

520

521 **Construction of pKG11 *rscS1*(ntA1141::Δ).** Plasmid pKG11 encodes an overexpression allele  
522 of RscS, termed *rscS1* (15, 28). *rscS* nucleotide A1141 was deleted on the plasmid using the  
523 Stratagene Quikchange II Site-Directed Mutagenesis Kit with primers *rscS\_del1F* and  
524 *rscS\_del1R*. The resulting plasmid, pMJM33, was sequenced with primers MJM-154F and  
525 MJM-306R to confirm the single base pair deletion.

526

527 **Squid colonization.** Hatchling *E. scolopes* were colonized by exposure to approximately 3 x  
528 10<sup>3</sup> CFU/ml (ranging from 5.2 x 10<sup>2</sup> - 1.4 x 10<sup>4</sup> CFU/ml; as specified in figure legends) of each  
529 strain in a total volume of 40 ml of FSIO (filter-sterilized Instant Ocean) for 3 hours. Squid were  
530 then transferred to 100 ml of FSIO to stop the inoculation and then transferred to 40 ml FSIO for  
531 an additional 45 hours with a water change at 24 hours post inoculation. For Figure 10A,  
532 kanamycin was added to the FSIO to keep selective pressure on the plasmid. After 48 hours of  
533 colonization, the squid were euthanized and surface sterilized by storage at -80 °C, according to  
534 standard practices (51). For determination of CFU per light organ, hatchlings were thawed,  
535 homogenized, and 50 μl of homogenate dilutions was plated onto LBS plates. Bacterial colonies

536 from each plate were counted and recorded. Mock treated, uncolonized hatchlings (“apo-  
537 symbiotic”) were used to determine the limit of detection in the assay. The competitive index  
538 (CI) was calculated from the relative CFU of each sample in the output (light organ) versus the  
539 input (inoculum) as follows:  
540  $\text{Log}_{10} ((\text{Test strain}[\text{light organ}] / \text{Control strain}[\text{light organ}]) / (\text{Test strain}[\text{inoculum}] / \text{Control}$   
541  $\text{strain}[\text{inoculum}]))$ . For competitions of natural isolates, the Group A strain (or its  $\Delta rscS$   
542 derivative) was the test strain and the Group B strain was the control strain. Colony color was  
543 used to enumerate colonies from each--white for Group A strains MB11B1 and ES213; yellow  
544 for Group B strains ES114 and MB15A4--along with PCR verification of selected colonies. For  
545 competition between SR5 and SR5  $\Delta binK$ , 100 colonies per squid were patched onto LBS-Erm5  
546 and LBS.

547

548 **Colony biofilm assays.** Bacterial strains were grown in LBS media (Fig. 10C) or LBS-Cam2.5  
549 media (Figs. 2, 8) for approximately 17 hours, then 10  $\mu\text{l}$  (Fig. 2) or 8  $\mu\text{l}$  (Fig. 8, 10C) was  
550 spotted onto LBS plates (Fig. 10C) or LBS-Tet5 plates (Figs. 2, 8). Spots were allowed to dry  
551 and the plates incubated at 25 °C for 48 hours. Images of the spots were taken at 24 and 48 h  
552 post-spotting using a Leica M60 microscope and Leica DFC295 camera. After 48 h of growth,  
553 the spots were disrupted using a flat toothpick and imaged similarly.

554

555 **Analysis of DNA and protein sequences *in silico*.** Amino acid sequences for *V. fischeri*  
556 ES114 *syp* genes were obtained from RefSeq accession NC\_006841.2. Local TBLASTN queries  
557 were performed for each protein against nucleotide databases for the following strains, each of  
558 which were derived from the RefSeq *cds\_from\_genomic.fna* file: *V. fischeri* SR5  
559 (GCA\_000241785.1), *V. fischeri* MB11B1 (GCA\_001640385.1) and *V. vulnificus* ATCC27562  
560 (GCA\_002224265.1). Percent amino acid identity was calculated as the identity in the BLAST

561 query divided by the length of the amino acid sequence in ES114. Domain information is from  
 562 the PFAM database (52).

563

564 **Table 1. Bacterial strains.**

| Strain             | Genotype                | Source/Reference |
|--------------------|-------------------------|------------------|
| <i>V. fischeri</i> |                         |                  |
| MJM1059            | MJ11                    | (25, 53)         |
| MJM1100            | ES114                   | (54)             |
| MJM1104            | ES114 (MJM1100) / pKV69 | This study       |
| MJM1106            | ES114 (MJM1100) / pKG11 | This study       |
| MJM1109            | MJ11 (MJM1059) / pKV69  | This study       |
| MJM1111            | MJ11 (MJM1059) / pKG11  | This study       |
| MJM1114            | MJ12                    | (53)             |
| MJM1115            | CG101                   | (25)             |
| MJM1117            | ES213                   | (55)             |
| MJM1119            | EM18                    | (25, 53)         |
| MJM1120            | EM24                    | (53, 56)         |
| MJM1121            | EM30                    | (53)             |
| MJM1122            | WH1                     | (57)             |

|         |                          |            |
|---------|--------------------------|------------|
| MJM1125 | SR5                      | (24)       |
| MJM1126 | SA1                      | (24)       |
| MJM1127 | KB1A97                   | (29)       |
| MJM1128 | KB2B1                    | (29)       |
| MJM1129 | KB5A1                    | (29)       |
| MJM1130 | MB11B1                   | (29)       |
| MJM1136 | EM17                     | (56)       |
| MJM1147 | <i>mjapo.6.1</i>         | (22)       |
| MJM1149 | <i>mjapo.7.1</i>         | (22)       |
| MJM1151 | <i>mjapo.8.1</i>         | (22)       |
| MJM1153 | <i>mjapo.9.1</i>         | (22)       |
| MJM1219 | <i>mjapo.8.1</i> / pKV69 | This study |
| MJM1221 | <i>mjapo.8.1</i> / pKG11 | This study |
| MJM1238 | MJ12 (MJM1114) / pKV69   | This study |
| MJM1239 | MJ12 (MJM1114) / pKG11   | This study |
| MJM1240 | SR5 (MJM1125) / pKV69    | This study |
| MJM1241 | SR5 (MJM1125) / pKG11    | This study |

|         |                          |            |
|---------|--------------------------|------------|
| MJM1242 | SA1 (MJM1126) / pKV69    | This study |
| MJM1243 | SA1 (MJM1126) / pKG11    | This study |
| MJM1244 | MB11B1 (MJM1130) / pKV69 | This study |
| MJM1245 | MB11B1 (MJM1130) / pKG11 | This study |
| MJM1246 | EM17 (MJM1136) / pKV69   | This study |
| MJM1247 | EM17 (MJM1136) / pKG11   | This study |
| MJM1254 | KB1A97 (MJM1127) / pKV69 | This study |
| MJM1255 | KB1A97 (MJM1127) / pKG11 | This study |
| MJM1256 | KB2B1 (MJM1128) / pKV69  | This study |
| MJM1257 | KB2B1 (MJM1128) / pKG11  | This study |
| MJM1258 | KB5A1 (MJM1129) / pKV69  | This study |
| MJM1259 | KB5A1 (MJM1129) / pKG11  | This study |
| MJM1260 | ES213 (MJM1117) / pKV69  | This study |
| MJM1261 | ES213 (MJM1117) / pKG11  | This study |
| MJM1266 | EM18 (MJM1119) / pKV69   | This study |
| MJM1267 | EM18 (MJM1119) / pKG11   | This study |
| MJM1268 | EM24 (MJM1120) / pKV69   | This study |



|         |                                      |            |
|---------|--------------------------------------|------------|
| MJM1269 | EM24 (MJM1120) / pKG11               | This study |
| MJM1270 | EM30 (MJM1121) / pKV69               | This study |
| MJM1271 | EM30 (MJM1121) / pKG11               | This study |
| MJM1272 | <i>mjapo.6.1</i> (MJM1147) / pKV69   | This study |
| MJM1273 | <i>mjapo.6.1</i> (MJM1147) / pKG11   | This study |
| MJM1274 | <i>mjapo.7.1</i> (MJM1149) / pKV69   | This study |
| MJM1275 | <i>mjapo.7.1</i> (MJM1149) / pKG11   | This study |
| MJM1276 | <i>mjapo.9.1</i> (MJM1151) / pKV69   | This study |
| MJM1277 | <i>mjapo.9.1</i> (MJM1151) / pKG11   | This study |
| MJM1278 | CG101 (MJM1115) / pKV69              | This study |
| MJM1279 | CG101 (MJM1115) / pKG11              | This study |
| MJM1280 | WH1 (MJM1122) / pKV69                | This study |
| MJM1281 | WH1 (MJM1122) / pKG11                | This study |
| MJM1782 | ES114 (MJM1100) pVSV104              | (18)       |
| MJM2114 | MB15A4                               | (29)       |
| MJM2226 | ES114 (MJM1100) / pMJM33             | This study |
| MJM2251 | ES114 (MJM1100) $\Delta$ <i>binK</i> | (18)       |

|         |                                                        |            |
|---------|--------------------------------------------------------|------------|
| MJM2386 | ES114 (MJM1100) / pBinK                                | This study |
| MJM2997 | MB11B1 (MJM1130) / pVSV104                             | This study |
| MJM2998 | MB11B1 (MJM1130) / pBinK                               | This study |
| MJM2999 | ES213 (MJM1117) / pVSV104                              | This study |
| MJM3000 | ES213 (MJM1117) / pBinK                                | This study |
| MJM3010 | ES114 (MJM1100) $\Delta rscS$                          | This study |
| MJM3017 | ES213 (MJM1117) $\Delta rscS$                          | This study |
| MJM3042 | MB15A4 (MJM2114) $\Delta rscS$                         | This study |
| MJM3046 | MB11B1 (MJM1130) $\Delta rscS$                         | This study |
| MJM3062 | ES114 (MJM1100) $\Delta syp$                           | This study |
| MJM3065 | MB11B1 (MJM1130) $\Delta syp$                          | This study |
| MJM3068 | ES213 (MJM1117) $\Delta syp$                           | This study |
| MJM3071 | MB15A4 (MJM2114) $\Delta syp$                          | This study |
| MJM3084 | MB11B1 (MJM1130) $\Delta binK$                         | This study |
| MJM3354 | ES114 (MJM1100) <i>sypE</i> (ntG33 $\Delta$ )          | This study |
| MJM3364 | ES114 (MJM1100) <i>sypE</i> (ntG33 $\Delta$ ) / pKV69  | This study |
| MJM3365 | ES114 (MJM1100) <i>sypE</i> (ntG33 $\Delta$ ) / pEAH73 | This study |

|                |                                                                |            |
|----------------|----------------------------------------------------------------|------------|
| MJM3370        | MB11B1 (MJM1130) / pKV69                                       | This study |
| MJM3371        | MB11B1 (MJM1130) / pEAH73                                      | This study |
| MJM3394        | ES114 (MJM1100) $\Delta rscS$<br><i>sypE</i> (ntG33 $\Delta$ ) | This study |
| MJM3397        | MB11B1 (MJM1130) <i>sypE</i> (nt33::G)                         | This study |
| MJM3398        | MB11B1 (MJM1130) <i>sypE</i> (nt33::G) /<br>pKV69              | This study |
| MJM3399        | MB11B1 (MJM1130) <i>sypE</i> (nt33::G) /<br>pEAH73             | This study |
| MJM3410        | MB11B1 (MJM1130) $\Delta sypE$                                 | This study |
| MJM3411        | MB11B1 (MJM1130) $\Delta sypE$ / pKV69                         | This study |
| MJM3412        | MB11B1 (MJM1130) $\Delta sypE$ / pEAH73                        | This study |
| MJM3417        | ES114 (MJM1100) $\Delta sypE$                                  | This study |
| MJM3418        | ES114 (MJM1100) $\Delta sypE$ / pKV69                          | This study |
| MJM3419        | ES114 (MJM1100) $\Delta sypE$ / pEAH73                         | This study |
| MJM3423        | ES114 (MJM1100) $\Delta rscS \Delta sypE$                      | This study |
| MJM3455        | ES114 (MJM1100) / pEAH73                                       | This study |
| MJM3501        | SR5 (MJM1125) $\Delta syp$                                     | This study |
| MJM3751        | SR5 (MJM1125) $\Delta binK::erm$                               | This study |
| <i>E. coli</i> |                                                                |            |

|         |                                                             |            |
|---------|-------------------------------------------------------------|------------|
| MJM534  | CC118 $\lambda$ pir / pEVS104                               | (58)       |
| MJM537  | DH5 $\alpha$ $\lambda$ pir                                  | Lab stock  |
| MJM570  | DH5 $\alpha$ / pEVS79                                       | (58)       |
| MJM580  | DH5 $\alpha$ $\lambda$ pir / pVSV104                        | (59)       |
| MJM581  | DH5 $\alpha$ / pKV69                                        | (60)       |
| MJM583  | DH5 $\alpha$ / pKG11                                        | (15)       |
| MJM639  | XL1-Blue / pMJM33                                           | This study |
| MJM658  | BW23474 / pEVS107                                           | (61)       |
| MJM2384 | DH5 $\alpha$ $\lambda$ pir / pBinK                          | (18)       |
| MJM2540 | KV5264 / pEAH73                                             | (39)       |
| MJM3008 | DH5 $\alpha$ / pEVS79- $\Delta$ rscS[MJM1100]               | This study |
| MJM3014 | DH5 $\alpha$ $\lambda$ pir / pEVS79- $\Delta$ rscS[MJM1117] | This study |
| MJM3039 | DH5 $\alpha$ $\lambda$ pir / pEVS79- $\Delta$ rscS[MJM2114] | This study |
| MJM3043 | DH5 $\alpha$ $\lambda$ pir / pEVS79- $\Delta$ rscS[MJM1130] | This study |
| MJM3060 | NEB5 $\alpha$ / pEVS79- $\Delta$ syp[MJM1100]               | This study |
| MJM3063 | NEB5 $\alpha$ / pEVS79- $\Delta$ syp[MJM1130]               | This study |
| MJM3066 | DH5 $\alpha$ $\lambda$ pir / pEVS79- $\Delta$ syp[MJM1117]  | This study |

|         |                                                     |            |
|---------|-----------------------------------------------------|------------|
| MJM3069 | DH5α λpir / pEVS79-Δ <i>syp</i> [MJM2114]           | This study |
| MJM3082 | NEB5α / pEVS79-Δ <i>binK</i> [MJM1130]              | This study |
| MJM3287 | NEB5α / pHB1                                        | This study |
| MJM3338 | DH5α λpir / pEVS107- <i>sypE</i> [MJM1130](nt33::G) | This study |
| MJM3340 | DH5α λpir / pEVS107- <i>sypE</i> [MJM1100](ntG33Δ)  | This study |
| MJM3351 | NEB5α / pEVS79- <i>sypE</i> [MJM1130](nt33::G)      | This study |
| MJM3352 | NEB5α / pEVS79- <i>sypE</i> [MJM1100](ntG33Δ)       | This study |
| MJM3409 | NEB5α / pEVS79-Δ <i>sypE</i> [MJM1130]              | This study |
| MJM3416 | NEB5α / pEVS79-Δ <i>sypE</i> [MJM1100]              | This study |

565

566 **Table 2. Plasmids.**

| Plasmid | Relevant genotype                                             | Source/Reference |
|---------|---------------------------------------------------------------|------------------|
| pEVS79  | Vector backbone (Cam <sup>R</sup> ) for deletion construction | (58)             |
| pKV69   | Vector backbone (Cam <sup>R</sup> /Tet <sup>R</sup> )         | (60)             |
| pKG11   | pKV69 carrying <i>rscS1</i>                                   | (15)             |
| pMJM33  | pKG11 <i>rscS1</i> (ntA1141::Δ)                               | This study       |
| pEVS104 | Conjugation helper plasmid (Kan <sup>R</sup> )                | (58)             |

|                                                                     |                                                                                 |            |
|---------------------------------------------------------------------|---------------------------------------------------------------------------------|------------|
| pEVS107                                                             | Mini-Tn7 mobilizable vector (Erm <sup>R</sup> /Kan <sup>R</sup> )               | (61)       |
| pEAH73                                                              | pKV69 carrying <i>sypG</i> from ES114                                           | (39)       |
| pVSV104                                                             | Complementation vector (Kan <sup>R</sup> )                                      | (59)       |
| pBinK                                                               | pVSV104 carrying <i>binK</i> from MJM1100                                       | (18)       |
| pHB1                                                                | pUC19 FRT- <i>erm</i> -FRT                                                      | This study |
| pEVS79- $\Delta$ <i>rscS</i> [MJM1100]                              | pEVS79 carrying 1.6 kb US/1.6 kb DS of <i>rscS</i> from MJM1100                 | This study |
| pEVS79- $\Delta$ <i>rscS</i> [MJM1117]                              | pEVS79 carrying 1.6 kb US/1.6 kb DS of <i>rscS</i> from MJM1117                 | This study |
| pEVS79- $\Delta$ <i>rscS</i> [MJM2114]                              | pEVS79 carrying 1.6 kb US/1.6 kb DS of <i>rscS</i> from MJM2114                 | This study |
| DH5 $\alpha$ $\lambda$ pir / pEVS79- $\Delta$ <i>rscS</i> [MJM1130] | pEVS79 carrying 1.6 kb US/1.6 kb DS of <i>rscS</i> from MJM1130                 | This study |
| pEVS79- $\Delta$ <i>syp</i> [MJM1100]                               | pEVS79 carrying 1.6 kb US of <i>sypA</i> /1.6 kb DS of <i>sypR</i> from MJM1100 | This study |
| pEVS79- $\Delta$ <i>syp</i> [MJM1130]                               | pEVS79 carrying 1.6 kb US of <i>sypA</i> /1.6 kb DS of <i>sypR</i> from MJM1130 | This study |
| pEVS79- $\Delta$ <i>syp</i> [MJM1117]                               | pEVS79 carrying 1.6 kb US of <i>sypA</i> /1.6 kb DS of <i>sypR</i> from MJM1117 | This study |
| pEVS79- $\Delta$ <i>syp</i> [MJM2114]                               | pEVS79 carrying 1.6 kb US of <i>sypA</i> /1.6 kb DS of <i>sypR</i> from MJM2114 | This study |
| pEVS79- $\Delta$ <i>binK</i> [MJM1130]                              | pEVS79 carrying 1.6 kb US/1.6 kb DS of <i>binK</i> from MJM1130                 | This study |
| pEVS107- <i>sypE</i> [MJM1130](nt33::G)                             | pEVS107 carrying the <i>sypE</i> (nt33::G) allele from MJM1130                  | This study |
| pEVS107- <i>sypE</i> [MJM1100](ntG33 $\Delta$ )                     | pEVS107 carrying the <i>sypE</i> (ntG33 $\Delta$ ) allele from MJM1100          | This study |

|                                        |                                                                 |            |
|----------------------------------------|-----------------------------------------------------------------|------------|
| pEVS79- <i>sypE</i> [MJM1130](nt33::G) | pEVS79 carrying the <i>sypE</i> (nt33::G) allele from MJM1130   | This study |
| pEVS79- <i>sypE</i> [MJM1100](ntG33Δ)  | pEVS79 carrying the <i>sypE</i> (ntG33Δ) allele from MJM1100    | This study |
| pEVS79-Δ <i>sypE</i> [MJM1130]         | pEVS79 carrying 1.6 kb US/1.6 kb DS of <i>sypE</i> from MJM1130 | This study |
| pEVS79-Δ <i>sypE</i> [MJM1100]         | pEVS79 carrying 1.6 kb US/1.6 kb DS of <i>sypE</i> from MJM1100 | This study |

567

568

569 **Table 3. DNA oligonucleotides for PCR amplification and sequencing.**

| Primer name           | Sequence (5' to 3')                              |
|-----------------------|--------------------------------------------------|
| DAT_015F              | ACCAAGAAGCAGTACGACGATTAT                         |
| ES114_DS_ver          | GGATGTTTTAGATGTTGCGG                             |
| ES114_indel_for       | TTACTTTTTTCAGATACAAAGCCC                         |
| ES114_indel_rev       | GTTGTTCTGATAGTGCGTGA                             |
| ES114_US_ver          | ATCAACTCAAGAACTCCCC                              |
| for_ver_sypE          | CCGGCTCAAAC TATTGCAG                             |
| Gib_ES114_binK_DS_for | attaatcgatGCGTATACATAAATAATGATTCATATATAC         |
| Gib_ES114_binK_DS_rev | gcaggaattcgatatcaagcTTTCAATACTGTGTTTTTATGC       |
| Gib_ES114_binK_US_for | gaggtcgacggtatcgataaGAGCCTTTTAAATCCCCTAAC        |
| Gib_ES114_binK_US_rev | atgtatacgcATCGATTAATGACATATTATTATTCATAAAAA<br>AC |

|                       |                                                   |
|-----------------------|---------------------------------------------------|
| Gib_ES114_rscS_DS_for | taatgcaatgGAGAAGTATGAAACACAATAAAC                 |
| Gib_ES114_rscS_DS_rev | gcaggaattcgatatcaagcAAAAATACATTGTTGCACTTG         |
| Gib_ES114_rscS_US_for | gaggtcgacggtatcgataaGACGTCTAAACTGAATCG            |
| Gib_ES114_rscS_US_rev | catacttctcCATTGCATTAGCTCCTATAAAATAG               |
| Gib_ES114_syp_DS_for  | gcttattatgATATTTGCTCGAGGCCAATAAAAAC               |
| Gib_ES114_syp_DS_rev  | gcaggaattcgatatcaagcTGGTGAATGTAGGATCCAC           |
| Gib_ES114_syp_US_for  | gaggtcgacggtatcgataaCAACCGTAGCGCCAAATG            |
| Gib_ES114_syp_US_rev  | gagcaaatatCATAATAAGCTCCTAGGGAATAATC               |
| Gib_ES114_sypE_C_for  | cagatacaaaCCCACATCACTAGAGTCG                      |
| Gib_ES114_sypE_C_rev  | ctagtggccaggtacctcgaAATTAAGCTTCCATCTTCAC          |
| Gib_ES114_sypE_DS_for | tgtaatcatgCTGTTAATTGAGAATCAATAAAAAG               |
| Gib_ES114_sypE_DS_rev | caactctttttccgaaggtaTTGAGTAACCGGCATAATTTAG        |
| Gib_ES114_sypE_N_for  | tagagggcctaggcgcgccTGTTTCACAACTCAATACC            |
| Gib_ES114_sypE_N_rev  | gtgatgtgggTTTGTATCTGAAAAAAGTAAAGTAG               |
| Gib_ES114_sypE_US_for | gaggtcgacggtatcgataaTGGTCAGATGAAATGTCATTTT<br>TAG |
| Gib_ES114_sypE_US_rev | caattaacagCATGATTACCACTGTTG                       |
| Gib_ES213_rscS_US_rev | catacttctcCATTGTATTAGCTCCTATAAAATAG               |



|                        |                                                         |
|------------------------|---------------------------------------------------------|
| Gib_MB11B1_syp_DS_for  | gcttattatgATATTTGCTCGAGGTCAATAAAAG                      |
| Gib_MB11B1_syp_US_for  | gaggtcgacggtatcgataaGCACACTGATAACTAAATTATT<br>AC        |
| Gib_MB11B1_syp_US_rev  | gagcaaatatCATAATAAGCTCCTAGGG                            |
| Gib_MB11B1_sypE_C_for  | cagatacaaaGCCAACATCACTAGAATC                            |
| Gib_MB11B1_sypE_C_rev  | ctagtggccaggtacctcgaTCAACAATTAAGCTTCCATC                |
| Gib_MB11B1_sypE_DS_for | cagtggatgCTGTTAATTGAAAACCAATAGC                         |
| Gib_MB11B1_sypE_DS_rev | gcaggaattcgatatcaagcATTTAGGATGTTTTTAATAACA<br>ATTTG     |
| Gib_MB11B1_sypE_N_for  | tagagggcctaggcgcgccAGTTTCACAACACTCAATACTAAT<br>AATATTC  |
| Gib_MB11B1_sypE_N_rev  | tgatgttggcTTTGTATCTGAAAAAAGCAAATAG                      |
| Gib_MB11B1_sypE_US_for | gaggtcgacggtatcgataaGAATGGTCAGATGAAATGTC                |
| Gib_MB11B1_sypE_US_rev | caattaacagCATACCACTGTTGATAAAAATC                        |
| Gib_pEVS79_ES_sypE_for | gaggtcgacggtatcgataaTGTTTCACAACACTCAATACC               |
| Gib_pEVS79_ES_sypE_rev | gcaggaattcgatatcaagcAATTAAGCTTCCATCTTCAC                |
| Gib_pEVS79_MB_sypE_for | gaggtcgacggtatcgataaAGTTTCACAACACTCAATACTAAT<br>AATATTC |
| Gib_pEVS79_MB_sypE_rev | gcaggaattcgatatcaagcTCAACAATTAAGCTTCCATC                |
| Gib_SR5_syp_DS_for     | gcttattatgATATTTGCTCGAGGACAATAAAAG                      |
| Gib_SR5_syp_DS_rev     | gcaggaattcgatatcaagcTGGTGAGTGTAGAATCCATTC               |

|                    |                                                                                                               |
|--------------------|---------------------------------------------------------------------------------------------------------------|
| Gib_SR5_syp_US_for | gaggtcgacggtatcgataaAACCGTAGCGCCAAATGG                                                                        |
| Gib_SR5_syp_US_rev | gagcaaatatCATAATAAGCTCCTAGGGAATAATCC                                                                          |
| HB8                | ACAAAATTTTAAGATACTGCACTATCAACACACTCTTAAG                                                                      |
| HB9                | GGGAGGAAATAATCTAGAATGCGAGAGTAGG                                                                               |
| HB23               | TTGGAGAGCCAGCTGCGTTCGCTAA                                                                                     |
| HB39               | TAGGAAGCTTACGAGACGAGCTTCTTATATATGCTTCGCCAG<br>GAAGTTCCTATTCTCTAGAAAGTATAGGAACCTTCCTTAGAAG<br>CAAACCTAAGAGTGTG |
| HB41               | CGATCTTGTGGGTAGAGACATCCAGGTCAAGTCCAGCCCCGC<br>TCTAGTTTGGGAATCAAGTGCATGAGCGCTGAAG                              |
| HB42               | ACGAGACGAGCTTCTTATATATGCTTCGCCAG                                                                              |
| HB146              | CGATCTTGTGGGTAGAGACATC                                                                                        |
| binK-F1            | GAAATTACCATGGAGCCAACAGCAAGAC                                                                                  |
| binK-R1-LUH        | ctggcgaagcatatataagaagctcgtctcgtCATAAAAAAC<br>CTAGCGCTTTATTTGTAGATATAATTATTA ACTATAATCGC                      |
| binK-F2-RUH        | gacttgacctggatgtctctaccacaagatcgCGCTCATTG<br>TATCTATAGAGTATGTACTGAGTTACG                                      |
| binK-R2            | GGCATCATTATGGCAACCATTAAAGACG                                                                                  |
| binK-FO            | CCGTTAATACTGGATTATTCGCTTGAATTTGAACG                                                                           |
| KMB_036            | CCACAATAGCAGAATACAAATTCGCTG                                                                                   |
| KMB_037            | CTCAAAATGACAGTCAGAGTATCGTAGGC                                                                                 |
| JFB_287            | ATGGAGTTTCTACGTCAACCAGAA                                                                                      |

|                  |                                                  |
|------------------|--------------------------------------------------|
| JFB_287_MB11B1   | ATGGAGTTTTTACGTCAACCAGAG                         |
| JFB_288          | TGTTATAACGATTACATGGCAGCG                         |
| JFB_365          | GGAAAGAGAATGATTAAG                               |
| M13for           | GTAAAACGACGGCCAG                                 |
| M13rev           | CAGGAAACAGCTATGAC                                |
| MB11B1_indel_for | GCTTTTTTCAGATACAAAGCCA                           |
| MB11B1_indel_rev | ATACCTGATGGAAACGACCT                             |
| MJM-154F         | TAAAAGGGAATTAATCCGC                              |
| MJM-306R         | AACTCTAACCAAGAAGCA                               |
| pEVS107_3837     | GGCGCGCCTAGGGCCCTC                               |
| pEVS107_3838     | TCGAGGTACCTGGCCACTAG                             |
| pEVS79_for_691   | GCTTGATATCGAATTCCTG                              |
| pEVS79_rev_690   | TTATCGATACCGTCGACC                               |
| rev_ver_sypE     | TTCACCATGAGTGCCAAATC                             |
| rscS_del1F       | CTTATCTTCTAGTTCTTTTTTTTAGTGATGTCTCTTCTACG<br>GC  |
| rscS_del1R       | GCCGTAGAAAGAGACATCACTAAAAAAGAAGACTAGAAGATA<br>AG |
| rscS_ver_1       | GTAATTCAGTAATGCTACC                              |

|                  |                          |
|------------------|--------------------------|
| rscS_ver_2       | GTCGCACCGTCAGGTATA       |
| rscS_ver_3       | AAGAAATTATTCGCTACC       |
| rscS_ver_4       | AGTTAGTAGGCCATTACG       |
| SR5_syp_ver_for  | TAGGCGTATCAAAAACCACCT    |
| SR5_syp_ver_rev  | TCAGGAATGTCGATGGCAG      |
| Syp_ver_DS_rev   | ATCGAGCATATTTTGCCAATC    |
| Syp_ver_US_for   | ACCTATCAACTCTTAAGTCGATTC |
| syp4F            | TGAGGATCCCATCGTGCCATA    |
| syp4R            | AGCTCCTTTGCAATGTTTGCTT   |
| syp5F            | TATTAGGCCGTTTCCACCAGG    |
| syp5F-B          | TATTAGGTCGTTTCCATCAGG    |
| sypA_out         | AACAGGAATTGCGTTTTCAA     |
| US_syp_flank_for | ACCACTGTGATAACTTGCAC     |
| US_syp_flank_rev | ATGAGGCATAACCTGTTCCA     |

570 For Gibson assembly primers, capital letters indicate homology to the template. All primers were  
571 designed for this study except MJM-154F, MJM-306R (22); JFB\_287, JFB\_288, and JFB\_365  
572 (18); and M13 for, M13 rev.

573

574

575

576 **ACKNOWLEDGMENTS**

577

578 The authors thank Elizabeth Bacon, Jacklyn Duple, Cheeneng Moua, Lynn Naughton, Olivia  
579 Sauls, and Denise Tarnowski for assistance with experiments.

580

581 **FUNDING INFORMATION**

582

583 This work was funded by NIH grants R35GM119627 (to M.J.M.) and R21AI117262 (M.J.M.) and  
584 NSF grant IOS-1757297 (M.J.M.). Support for trainees was provided on NIGMS grants  
585 T32GM008061 (J.F.B.) and T32GM008349 (K.M.B.). This work was funded by the Chicago  
586 Biomedical Consortium with support from the Searle Funds at The Chicago Community Trust  
587 (supporting E.R.R.).

588

589 **REFERENCES**

- 590 1. Long SR. 1996. *Rhizobium* symbiosis: nod factors in perspective. *Plant Cell* 8:1885–1898.
- 591 2. Roche P, Maillet F, Plaz Janet C, Debelle F, Ferro M, Truchet G, Promé JC, Dénarié J. 1996.  
592 The common *nodABC* genes of *Rhizobium meliloti* are host-range determinants. *Proc Natl*  
593 *Acad Sci U S A* 93:15305–15310.
- 594 3. Costello EK, Lauber CL, Hamady M, Fierer N, Gordon JI, Knight R. 2009. Bacterial  
595 community variation in human body habitats across space and time. *Science* 326:1694–  
596 1697.
- 597 4. Grice EA, Kong HH, Conlan S, Deming CB, Davis J, Young AC, NISC Comparative  
598 Sequencing Program, Bouffard GG, Blakesley RW, Murray PR, Green ED, Turner ML,  
599 Segre JA. 2009. Topographical and temporal diversity of the human skin microbiome.

- 600 Science 324:1190–1192.
- 601 5. Mark Welch JL, Rossetti BJ, Rieken CW, Dewhirst FE, Borisy GG. 2016. Biogeography of a  
602 human oral microbiome at the micron scale. Proc Natl Acad Sci U S A 113:E791–E800.
- 603 6. Ruby EG. 2008. Symbiotic conversations are revealed under genetic interrogation. Nat Rev  
604 Microbiol 6:752–762.
- 605 7. Nyholm SV, McFall-Ngai MJ. 2004. The winnowing: establishing the squid-vibrio symbiosis.  
606 Nat Rev Microbiol 2:632–642.
- 607 8. Visick KL, Ruby EG. 2006. *Vibrio fischeri* and its host: it takes two to tango. Curr Opin  
608 Microbiol 9:632–638.
- 609 9. Mandel MJ, Schaefer AL, Brennan CA, Heath-Heckman EAC, Deloney-Marino CR, McFall-  
610 Ngai MJ, Ruby EG. 2012. Squid-derived chitin oligosaccharides are a chemotactic signal  
611 during colonization by *Vibrio fischeri*. Appl Environ Microbiol 78:4620–4626.
- 612 10. Jones BW, Nishiguchi MK. 2004. Counterillumination in the Hawaiian bobtail squid,  
613 *Euprymna scolopes* Berry (Mollusca: Cephalopoda). Mar Biol 144:1151–1155.
- 614 11. Ruby EG, McFall-Ngai MJ. 1992. A squid that glows in the night: development of an animal-  
615 bacterial mutualism. J Bacteriol 174:4865–4870.
- 616 12. Wier AM, Nyholm SV, Mandel MJ, Massengo-Tiassé RP, Schaefer AL, Koroleva I, Splinter-  
617 Bondurant S, Brown B, Manzella L, Snir E, Almabrazi H, Scheetz TE, Bonaldo M de F,  
618 Casavant TL, Soares MB, Cronan JE, Reed JL, Ruby EG, McFall-Ngai MJ. 2010.  
619 Transcriptional patterns in both host and bacterium underlie a daily rhythm of anatomical  
620 and metabolic change in a beneficial symbiosis. Proc Natl Acad Sci U S A 107:2259–2264.
- 621 13. Visick KL. 2009. An intricate network of regulators controls biofilm formation and

- 622           colonization by *Vibrio fischeri*. Mol Microbiol 74:782–789.
- 623   14. Yip ES, Grublesky BT, Husa EA, Visick KL. 2005. A novel, conserved cluster of genes  
624           promotes symbiotic colonization and  $\sigma^{54}$ -dependent biofilm formation by *Vibrio fischeri*. Mol  
625           Microbiol 57:1485–1498.
- 626   15. Yip ES, Geszvain K, DeLoney-Marino CR, Visick KL. 2006. The symbiosis regulator RscS  
627           controls the *syp* gene locus, biofilm formation and symbiotic aggregation by *Vibrio fischeri*.  
628           Mol Microbiol 62:1586–1600.
- 629   16. Shibata S, Yip ES, Quirke KP, Ondrey JM, Visick KL. 2012. Roles of the Structural  
630           Symbiosis Polysaccharide (*syp*) Genes in Host Colonization, Biofilm Formation, and  
631           Polysaccharide Biosynthesis in *Vibrio fischeri*. J Bacteriol 194:6736–6747.
- 632   17. Morris AR, Visick KL. 2013. The response regulator SypE controls biofilm formation and  
633           colonization through phosphorylation of the *syp*-encoded regulator SypA in *Vibrio fischeri*.  
634           Mol Microbiol 87:509–525.
- 635   18. Brooks JF 2nd, Mandel MJ. 2016. The Histidine Kinase BinK Is a Negative Regulator of  
636           Biofilm Formation and Squid Colonization. J Bacteriol 198:2596–2607.
- 637   19. Tischler AH, Lie L, Thompson CM, Visick KL. 2018. Discovery of Calcium as a Biofilm-  
638           Promoting Signal for *Vibrio fischeri* Reveals New Phenotypes and Underlying Regulatory  
639           Complexity. J Bacteriol 200:e00016–18.
- 640   20. Pankey MS, Foxall RL, Ster IM, Perry LA, Schuster BM, Donner RA, Coyle M, Cooper VS,  
641           Whistler CA. 2017. Host-selected mutations converging on a global regulator drive an  
642           adaptive leap towards symbiosis in bacteria. Elife 6:e24414.
- 643   21. Thompson CM, Tischler AH, Tarnowski DA, Mandel MJ, Visick KL. 2018. Nitric oxide

- 644 inhibits biofilm formation by *Vibrio fischeri* via the nitric oxide-sensor HnoX. Mol Microbiol  
645 doi:10.1111/mmi.14147.
- 646 22. Mandel MJ, Wollenberg MS, Stabb EV, Visick KL, Ruby EG. 2009. A single regulatory gene  
647 is sufficient to alter bacterial host range. Nature 458:215–218.
- 648 23. Nyholm SV, Nishiguchi MK. 2008. The evolutionary ecology of a sepiolid squid-vibrio  
649 association: from cell to environment. Vie Milieu Paris 58:175–184.
- 650 24. Fidopiastis PM, von Boletzky S, Ruby EG. 1998. A new niche for *Vibrio logei*, the  
651 predominant light organ symbiont of squids in the genus *Sepioloa*. J Bacteriol 180:59–64.
- 652 25. Ruby EG, Lee KH. 1998. The *Vibrio fischeri*-*Euprymna scolopes* Light Organ Association:  
653 Current Ecological Paradigms. Appl Environ Microbiol 64:805–812.
- 654 26. Mandel MJ. 2010. Models and approaches to dissect host-symbiont specificity. Trends  
655 Microbiol 18:504–511.
- 656 27. Gyllborg MC, Sahl JW, Cronin DC 3rd, Rasko DA, Mandel MJ. 2012. Draft genome  
657 sequence of *Vibrio fischeri* SR5, a strain isolated from the light organ of the Mediterranean  
658 squid *Sepioloa robusta*. J Bacteriol 194:1639.
- 659 28. Geszvain K, Visick KL. 2008. Multiple factors contribute to keeping levels of the symbiosis  
660 regulator RscS low. FEMS Microbiol Lett 285:33–39.
- 661 29. Wollenberg MS, Ruby EG. 2009. Population structure of *Vibrio fischeri* within the light  
662 organs of *Euprymna scolopes* squid from Two Oahu (Hawaii) populations. Appl Environ  
663 Microbiol 75:193–202.
- 664 30. Wollenberg MS, Ruby EG. 2012. Phylogeny and fitness of *Vibrio fischeri* from the light  
665 organs of *Euprymna scolopes* in two Oahu, Hawaii populations. ISME J 6:352–362.



- 666 31. Elliott KT, DiRita VJ. 2008. Characterization of CetA and CetB, a bipartite energy taxis  
667 system in *Campylobacter jejuni*. *Mol Microbiol* 69:1091–1103.
- 668 32. Antonov I, Coakley A, Atkins JF, Baranov PV, Borodovsky M. 2013. Identification of the  
669 nature of reading frame transitions observed in prokaryotic genomes. *Nucleic Acids Res*  
670 41:6514–6530.
- 671 33. Bongrand C, Koch EJ, Moriano-Gutierrez S, Cordero OX, McFall-Ngai M, Polz MF, Ruby  
672 EG. 2016. A genomic comparison of 13 symbiotic *Vibrio fischeri* isolates from the  
673 perspective of their host source and colonization behavior. *ISME J* 10:2907–2917.
- 674 34. Altschul SF, Madden TL, Schäffer AA, Zhang J, Zhang Z, Miller W, Lipman DJ. 1997.  
675 Gapped BLAST and PSI-BLAST: a new generation of protein database search programs.  
676 *Nucleic Acids Res* 25:3389–3402.
- 677 35. Rusch DB, Rowe-Magnus DA. 2017. Complete Genome Sequence of the Pathogenic  
678 *Vibrio vulnificus* Type Strain ATCC 27562. *Genome Announc* 5:e00907–17.
- 679 36. Morris AR, Darnell CL, Visick KL. 2011. Inactivation of a novel response regulator is  
680 necessary for biofilm formation and host colonization by *Vibrio fischeri*. *Mol Microbiol*  
681 82:114–130.
- 682 37. Guo Y, Rowe-Magnus DA. 2011. Overlapping and unique contributions of two conserved  
683 polysaccharide loci in governing distinct survival phenotypes in *Vibrio vulnificus*. *Environ*  
684 *Microbiol* 13:2888–2990.
- 685 38. Morris AR, Visick KL. 2013. Inhibition of SypG-induced biofilms and host colonization by the  
686 negative regulator SypE in *Vibrio fischeri*. *PLoS One* 8:e60076.
- 687 39. Husa EA, Darnell CL, Visick KL. 2008. RscS functions upstream of SypG to control the

- 688 syp locus and biofilm formation in *Vibrio fischeri*. J Bacteriol 190:4576–4583.
- 689 40. Koehler S, Gaedeke R, Thompson C, Bongrand C, Visick KL, Ruby E, McFall-Ngai M.  
690 2018. The model squid-vibrio symbiosis provides a window into the impact of strain- and  
691 species-level differences during the initial stages of symbiont engagement. Environ  
692 Microbiol doi:10.1111/1462–2920.14392.
- 693 41. Ray VA, Visick KL. 2012. LuxU connects quorum sensing to biofilm formation in *Vibrio*  
694 *fischeri*. Mol Microbiol 86:954–970.
- 695 42. Giraud E, Moulin L, Vallenet D, Barbe V, Cytryn E, Avarre J-C, Jaubert M, Simon D,  
696 Cartieaux F, Prin Y, Bena G, Hannibal L, Fardoux J, Kojadinovic M, Vuillet L, Lajus A,  
697 Cruveiller S, Rouy Z, Mangenot S, Segurens B, Dossat C, Franck WL, Chang W-S,  
698 Saunders E, Bruce D, Richardson P, Normand P, Dreyfus B, Pignol D, Stacey G, Emerich  
699 D, Verméglio A, Médigue C, Sadowsky M. 2007. Legumes symbioses: absence of Nod  
700 genes in photosynthetic bradyrhizobia. Science 316:1307–1312.
- 701 43. Bonaldi K, Gargani D, Prin Y, Fardoux J, Gully D, Nouwen N, Goormachtig S, Giraud E.  
702 2011. Nodulation of *Aeschynomene afraspera* and *A. indica* by photosynthetic  
703 *Bradyrhizobium* Sp. strain ORS285: the Nod-dependent versus the Nod-independent  
704 symbiotic interaction. Mol Plant Microbe Interact 24:1359–1371.
- 705 44. Darriba D, Taboada GL, Doallo R, Posada D. 2012. jModelTest 2: more models, new  
706 heuristics and parallel computing. Nat Methods 9:772.
- 707 45. Swofford DL. 2003. PAUP\*: Phylogenetic Analysis Using Parsimony (\* and Other Methods)  
708 4th edn. Sinauer.
- 709 46. Ronquist F, Teslenko M, van der Mark P, Ayres DL, Darling A, Höhna S, Larget B, Liu L,  
710 Suchard MA, Huelsenbeck JP. 2012. MrBayes 3.2: efficient Bayesian phylogenetic

- 711 inference and model choice across a large model space. *Syst Biol* 61:539–542.
- 712 47. Ronquist F, van der Mark P, Huelsenbeck JP. 2009. Bayesian phylogenetic analysis using  
713 MrBayes, 2nd edn. Cambridge University Press.
- 714 48. Visick KL, Hodge-Hanson KM, Tischler AH, Bennett AK, Mastrodomenico V. 2018. Tools  
715 for Rapid Genetic Engineering of *Vibrio fischeri*. *Appl Environ Microbiol* 84:e00850–18.
- 716 49. Pollack-Berti A, Wollenberg MS, Ruby EG. 2010. Natural transformation of *Vibrio fischeri*  
717 requires *tfoX* and *tfoY*. *Environ Microbiol* 12:2302–2311.
- 718 50. Baba T, Ara T, Hasegawa M, Takai Y, Okumura Y, Baba M, Datsenko KA, Tomita M,  
719 Wanner BL, Mori H. 2006. Construction of *Escherichia coli* K-12 in-frame, single-gene  
720 knockout mutants: the Keio collection. *Mol Syst Biol* 2:2006.0008.
- 721 51. Naughton LM, Mandel MJ. 2012. Colonization of *Euprymna scolopes* squid by *Vibrio*  
722 *fischeri*. *J Vis Exp* e3758.
- 723 52. Finn RD, Coggill P, Eberhardt RY, Eddy SR, Mistry J, Mitchell AL, Potter SC, Punta M,  
724 Qureshi M, Sangrador-Vegas A, Salazar GA, Tate J, Bateman A. 2016. The Pfam protein  
725 families database: towards a more sustainable future. *Nucleic Acids Res* 44:D279–85.
- 726 53. Lee K-H. 1994. Ecology of *Vibrio fischeri*: the light organ symbiont of the Hawaiian sepiolid  
727 squid *Euprymna scolopes*. University of Southern California.
- 728 54. Boettcher KJ, Ruby EG. 1990. Depressed light emission by symbiotic *Vibrio fischeri* of the  
729 sepiolid squid *Euprymna scolopes*. *J Bacteriol* 172:3701–3706.
- 730 55. Boettcher KJ, Ruby EG. 1994. Occurrence of plasmid DNA in the sepiolid squid symbiont  
731 *Vibrio fischeri*. *Curr Microbiol* 29:279–286.

- 732 56. Nishiguchi MK, Ruby EG, McFall-Ngai MJ. 1998. Competitive dominance among strains of  
733 luminous bacteria provides an unusual form of evidence for parallel evolution in Sepiolid  
734 squid-vibrio symbioses. *Appl Environ Microbiol* 64:3209–3213.
- 735 57. Nishiguchi MK, Nair VS. 2003. Evolution of symbiosis in the Vibrionaceae: a combined  
736 approach using molecules and physiology. *Int J Syst Evol Microbiol* 53:2019–2026.
- 737 58. Stabb EV, Ruby EG. 2002. RP4-based plasmids for conjugation between *Escherichia coli*  
738 and members of the *Vibrionaceae*. *Methods Enzymol* 358:413–426.
- 739 59. Dunn AK, Millikan DS, Adin DM, Bose JL, Stabb EV. 2006. New *rfp*- and pES213-derived  
740 tools for analyzing symbiotic *Vibrio fischeri* reveal patterns of infection and *lux* expression in  
741 situ. *Appl Environ Microbiol* 72:802–810.
- 742 60. Visick KL, Skoufos LM. 2001. Two-component sensor required for normal symbiotic  
743 colonization of *Euprymna scolopes* by *Vibrio fischeri*. *J Bacteriol* 183:835–842.
- 744 61. McCann J, Stabb EV, Millikan DS, Ruby EG. 2003. Population dynamics of *Vibrio fischeri*  
745 during infection of *Euprymna scolopes*. *Appl Environ Microbiol* 69:5928–5934.
- 746

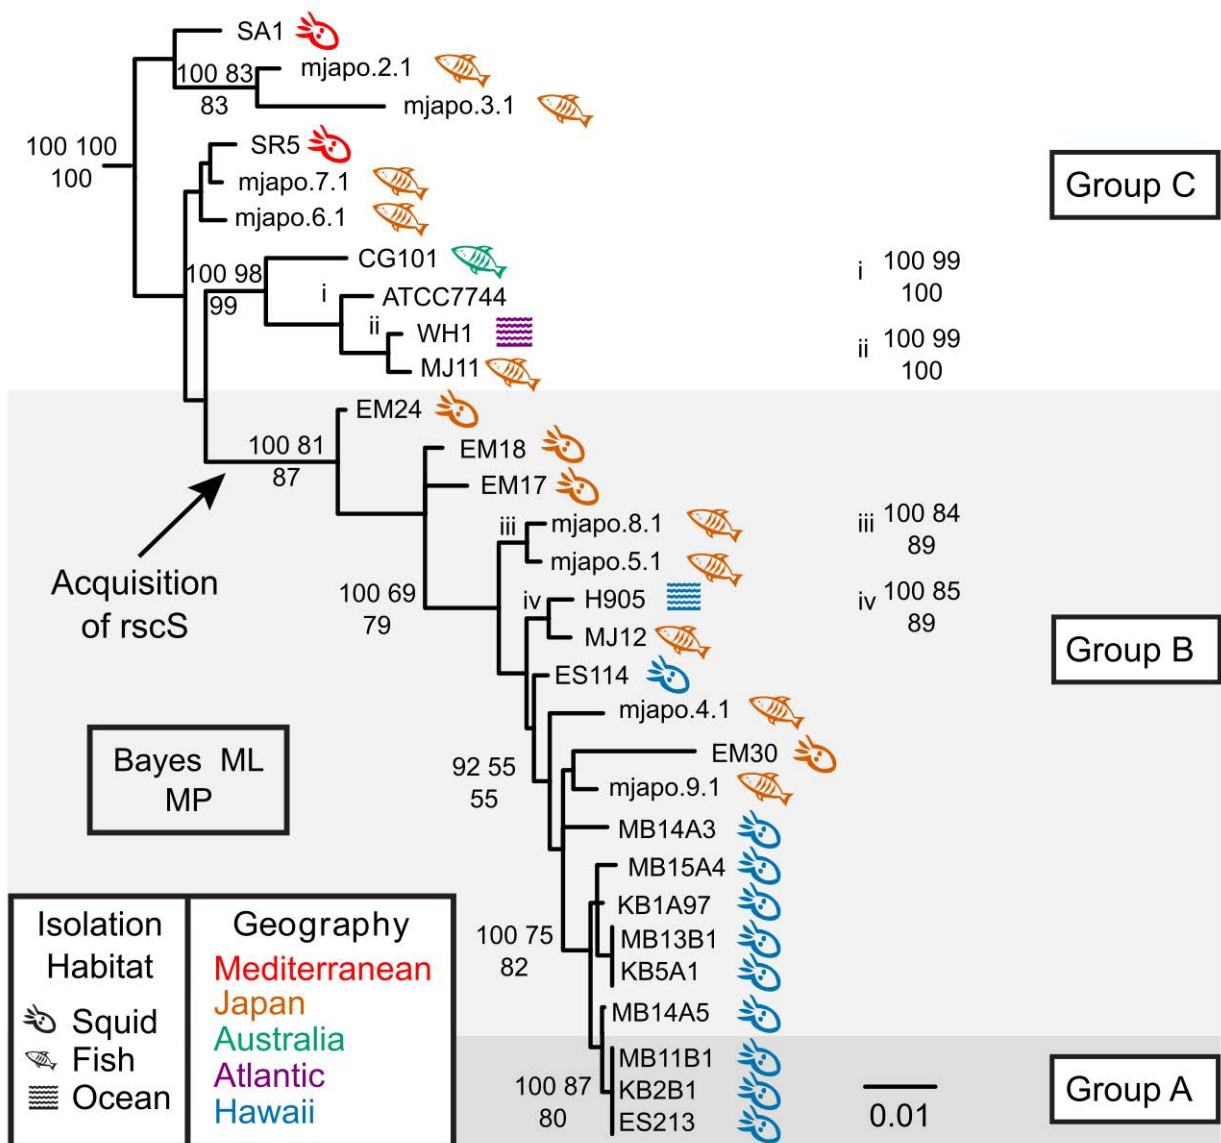

**Figure 1. *Vibrio* phylogeny, highlighting the source of each strain.** Bayesian phylogram (50% majority-rule consensus) inferred with a SYM+I+ $\Gamma$  model of evolution for the concatenated gene fragments *recA*, *mdh*, and *kata*. In this reconstruction, the root connected to a clade containing the four non-*V. fischeri* outgroup taxa. Statistical support is represented at nodes by the following three numbers: upper left, Bayesian posterior probability (of approximately 37,500 non-discarded samples) multiplied by 100; upper right, percentage of 1000 bootstrap Maximum Likelihood pseudo-replicates; bottom middle center, percentage of 1000 bootstrap Maximum Parsimony pseudo-replicates. Statistical support values are listed only at nodes where more than 2 methods generated support values  $\geq 50\%$ . Strains sharing identical sequences for a given locus fragment are listed next to a vertical bar at a leaf; because of a lack of space, some support values have been listed either immediately to the right of their associated nodes and are marked with italicized lower-case Roman numerals in the phylogram. The isolation habitat and geography of each strain are indicated by symbol and color, respectively. The black bar represents 0.01 substitutions/site.

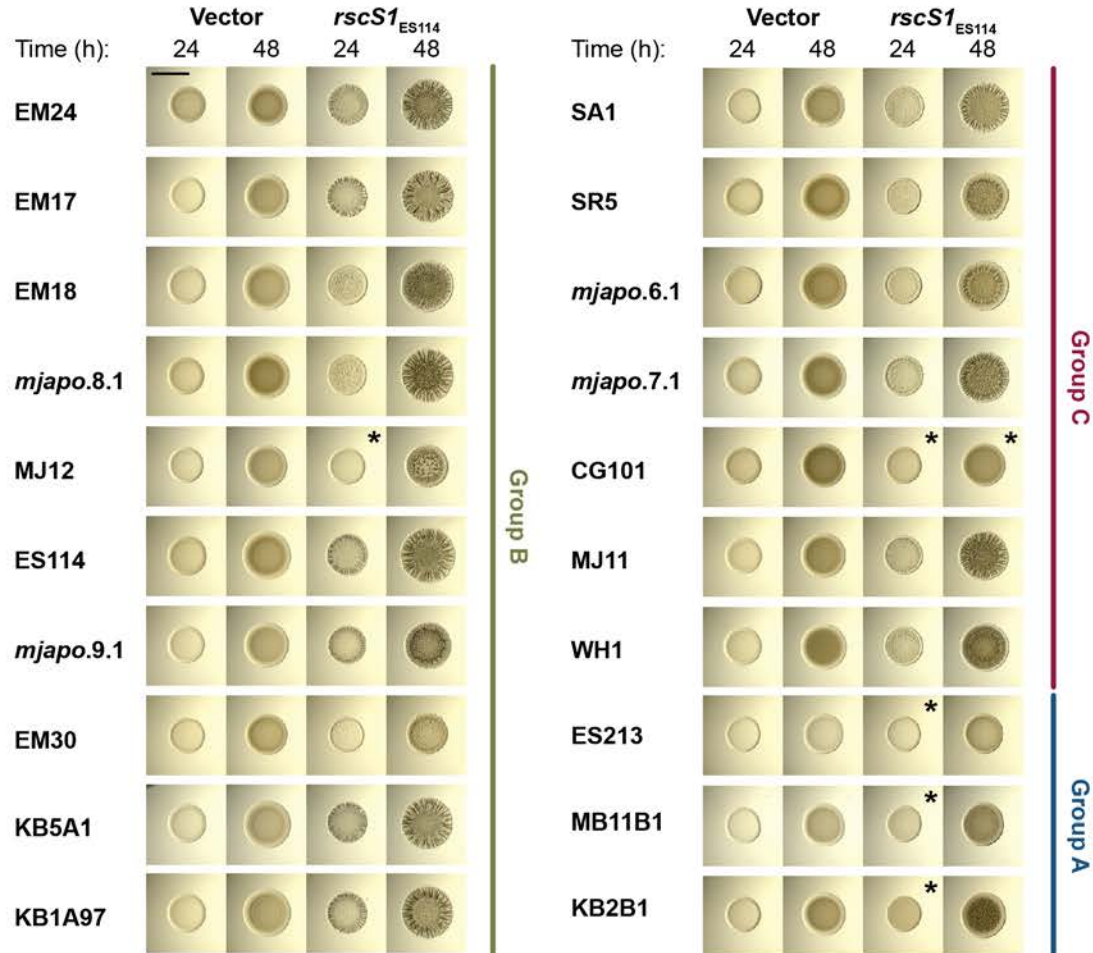

Figure 2. Most *V. fischeri* strains tested make colony biofilm in response to RscS overexpression. Spot assays of the indicated *V. fischeri* strains carrying pKV69 (vector) or pKG11 (*rscS1*; overexpressing ES114 *rscS*) after 24 and 48 h. Strains are MJM1268, MJM1269, MJM1246, MJM1247, MJM1266, MJM1267, MJM1219, MJM1221, MJM1238, MJM1239, MJM1104, MJM1106, MJM1276, MJM1277, MJM1270, MJM1271, MJM1258, MJM1259, MJM1254, MJM1255, MJM1242, MJM1243, MJM1240, MJM1241, MJM1272, MJM1273, MJM1274, MJM1275, MJM1278, MJM1279, MJM1109, MJM1111, MJM1280, MJM1281, MJM1260, MJM1261, MJM1244, MJM1245, MJM1256, and MJM1257. Different phenotypes were observed in the isolates examined. \* = no difference from the vector control was observed. The black bar is 5 mm in length.

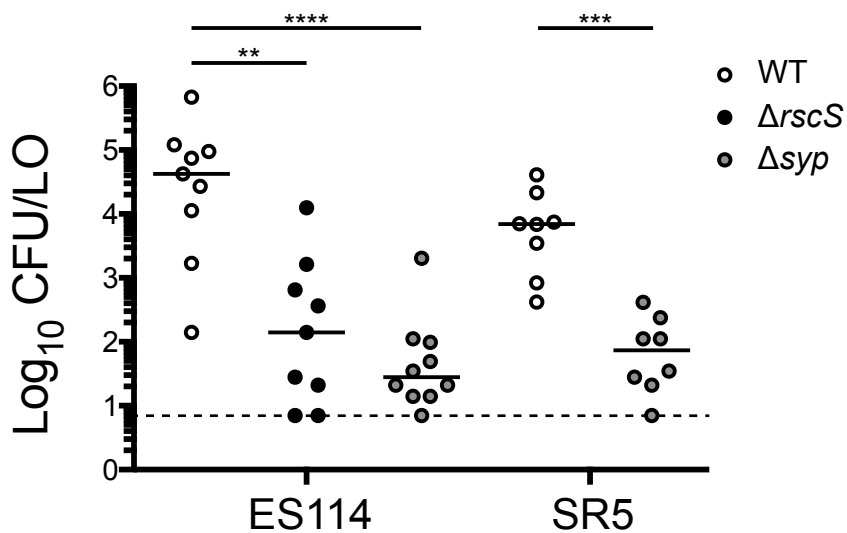

**Figure 3. Squid colonization in Group C strain SR5, which does not encode RscS, is dependent on the *syp* polysaccharide locus.** Single-strain colonization experiments were conducted and circles represent individual animals. The limit of detection for this assay, represented by the dashed line, is 7 CFU/LO, and the horizontal bars represent the median of each set. Hatchling squid were inoculated with  $1.5\text{-}3.2 \times 10^3$  CFU/ml bacteria, washed at 3 h and 24 h, and assayed at 48 h. Each dot represents an individual squid. Strains are: MJM1100, MJM3010, MJM3062, MJM1125, and MJM3501. Statistical comparisons by the Mann-Whitney test, \*\*  $p < 0.01$ , \*\*\*  $p < 0.001$ , \*\*\*\*  $p < 0.0001$ .

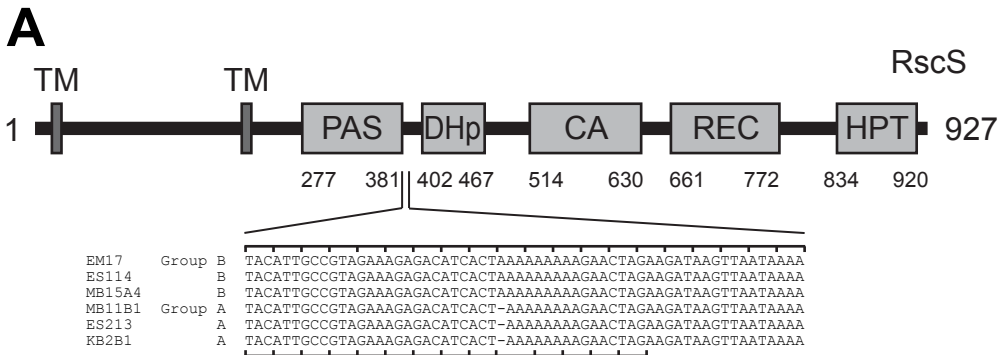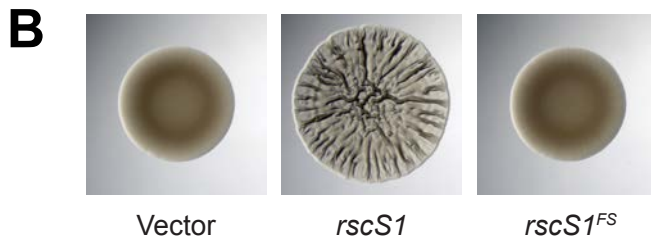

**Figure 4. Group A strains have a frameshift in *rscS*.** (A) ES114 RscS protein domains. Nucleotides 1114-1173 in ES114 RscS (AF319618) and their homologous sequences in the other Group B and Group A strains are listed. The -1 frameshift is present in the Group A *rscS* alleles. The ES114 reading frame is noted on the top of the alignment and the Group A reading frame on the bottom, which is predicted to end at the amber stop codon. (B) Deletion of A1141 in ES114 to mimic this frameshift in pKG11 renders it unable to induce a colony biofilm in a spot assay at 48 h. Strains are MJM1104, MJM1106, and MJM2226.



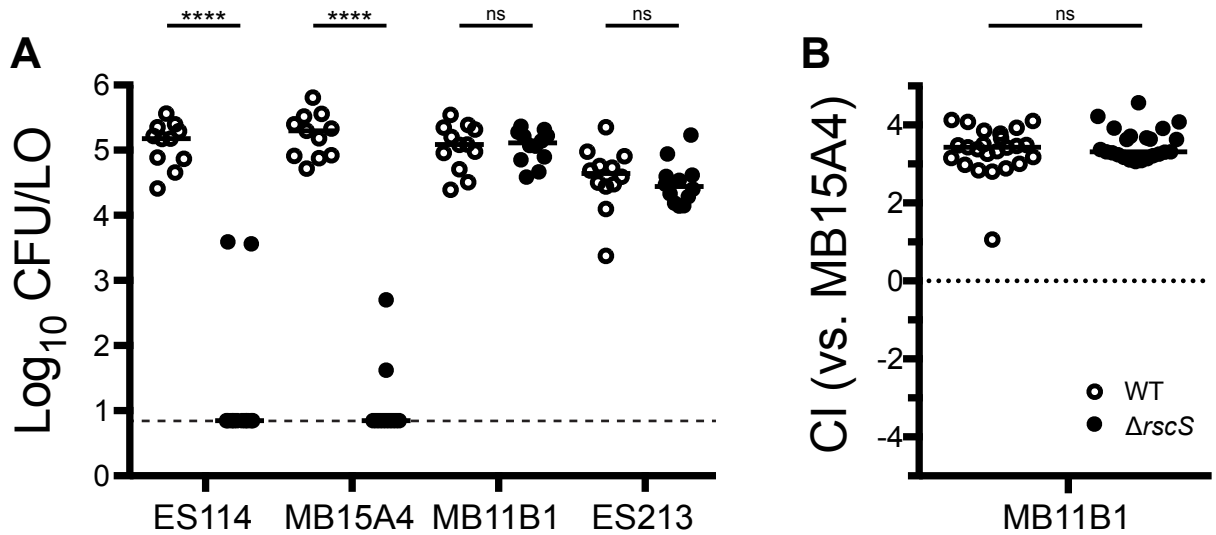

**Figure 5. Group A strains MB11B1 and ES213 do not require RscS for squid colonization.** Wild-type (WT) and  $\Delta rscS$  derivatives of the indicated strains were assayed in (A) a single-strain colonization assay and (B) competitive colonization against Group B strain MB15A4. Hatchling squid were inoculated at  $3.5\text{-}14 \times 10^3$  CFU/ml bacteria, washed at 3 h and 24 h, and assayed at 48 h. Each dot represents an individual squid. (A) Strains: MJM1100, MJM3010, MJM2114, MJM3042, MJM1130, MJM3046, MJM1117, and MJM3017. The limit of detection is represented by the dashed line, and the horizontal bars represent the median of each set. (B) The competitive index (CI) is defined in the methods and is shown on a Log<sub>10</sub> scale. Strains: MJM1130 and MJM3046, each competed against MJM2114. Values greater than 1 indicate more MB11B1. Statistical comparisons by the Mann-Whitney test, ns not significant, \*\*\*\*  $p < 0.0001$ .

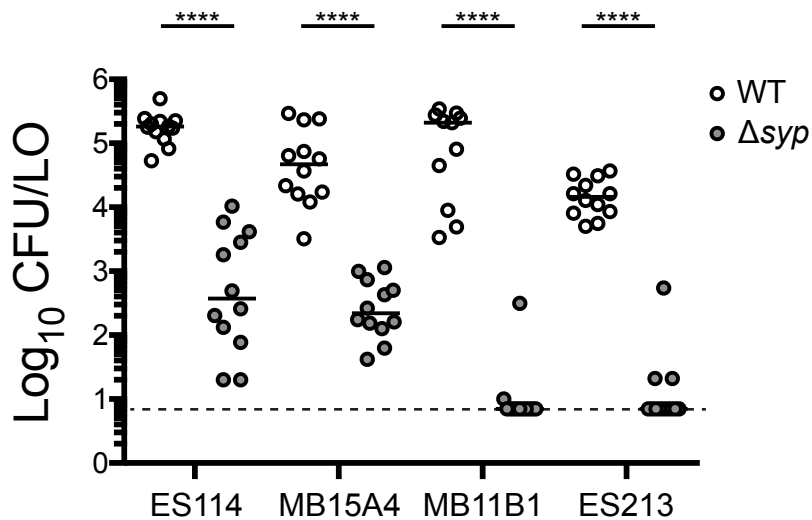

**Figure 6. Group B and Group C strains require the *syp* locus for robust squid colonization.** Wild type (WT) and  $\Delta syp$  derivatives of the indicated strains were assayed in a single strain colonization assay. Hatchling squid were inoculated with  $6.7\text{-}32 \times 10^2$  CFU/ml bacteria (ES114 and MB15A4 backgrounds) or  $5.2\text{-}8.9 \times 10^2$  CFU/ml bacteria (MB11B1 and ES213 backgrounds), washed at 3 h and 24 h, and assayed at 48 h. Each dot represents an individual squid. The limit of detection is represented by the dashed line and the horizontal bars represent the median of each set. Strains are MJM1100, MJM3062, MJM2114, MJM3071, MJM1130, MJM3065, MJM1117, and MJM3068. Statistical comparisons by the Mann-Whitney test, \*\*\*\*  $p < 0.0001$ .

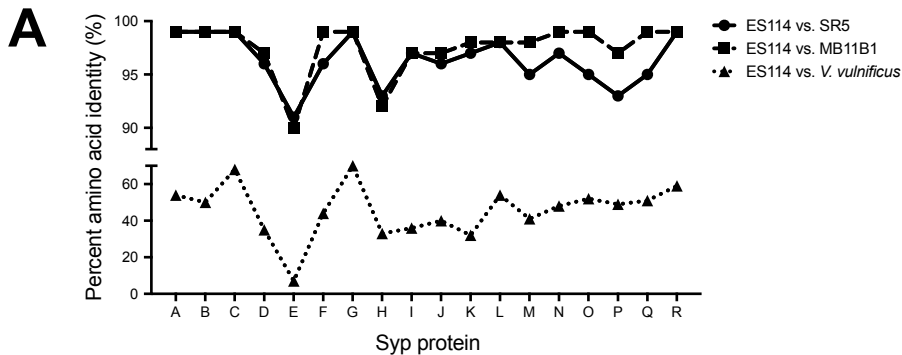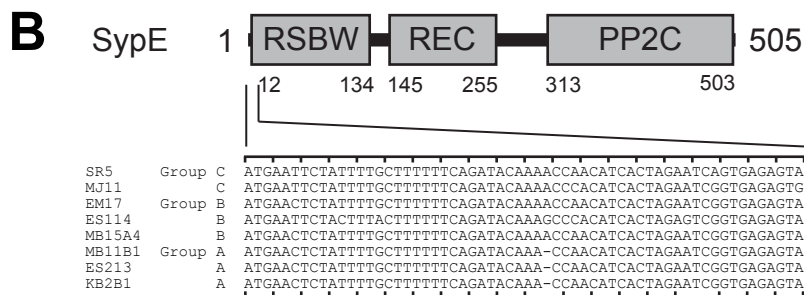

**Figure 7. Group A strains have a frameshift in *sypE*.** (A) Amino acid identity in the *Syp* locus. Results show the identity from TBLASTN query using the *V. fischeri* ES114 protein sequences as queries against genes in the homologous loci in *V. fischeri* strains or *V. vulnificus* ATCC 27562. The identity for *SypE* against *V. vulnificus* is plotted for the syntenous *RbdE*, although this is not the highest TBLASTN hit, as described in the text. (B) ES114 *SypE* protein domains. Nucleotides 1-60 in ES114 *sypE* and their homologous sequences in the other Group C, B, and A strains are listed. A-1 frameshift is present in the Group A *sypE* alleles. The ES114 reading frame is noted on the top of the alignment and the Group A reading frame on the bottom, which is predicted to end at the amber stop codon. A possible GTG start codon for the resumption of translation in the ES114 reading frame is present at the position corresponding to the 18th codon in ES114 *sypE*.

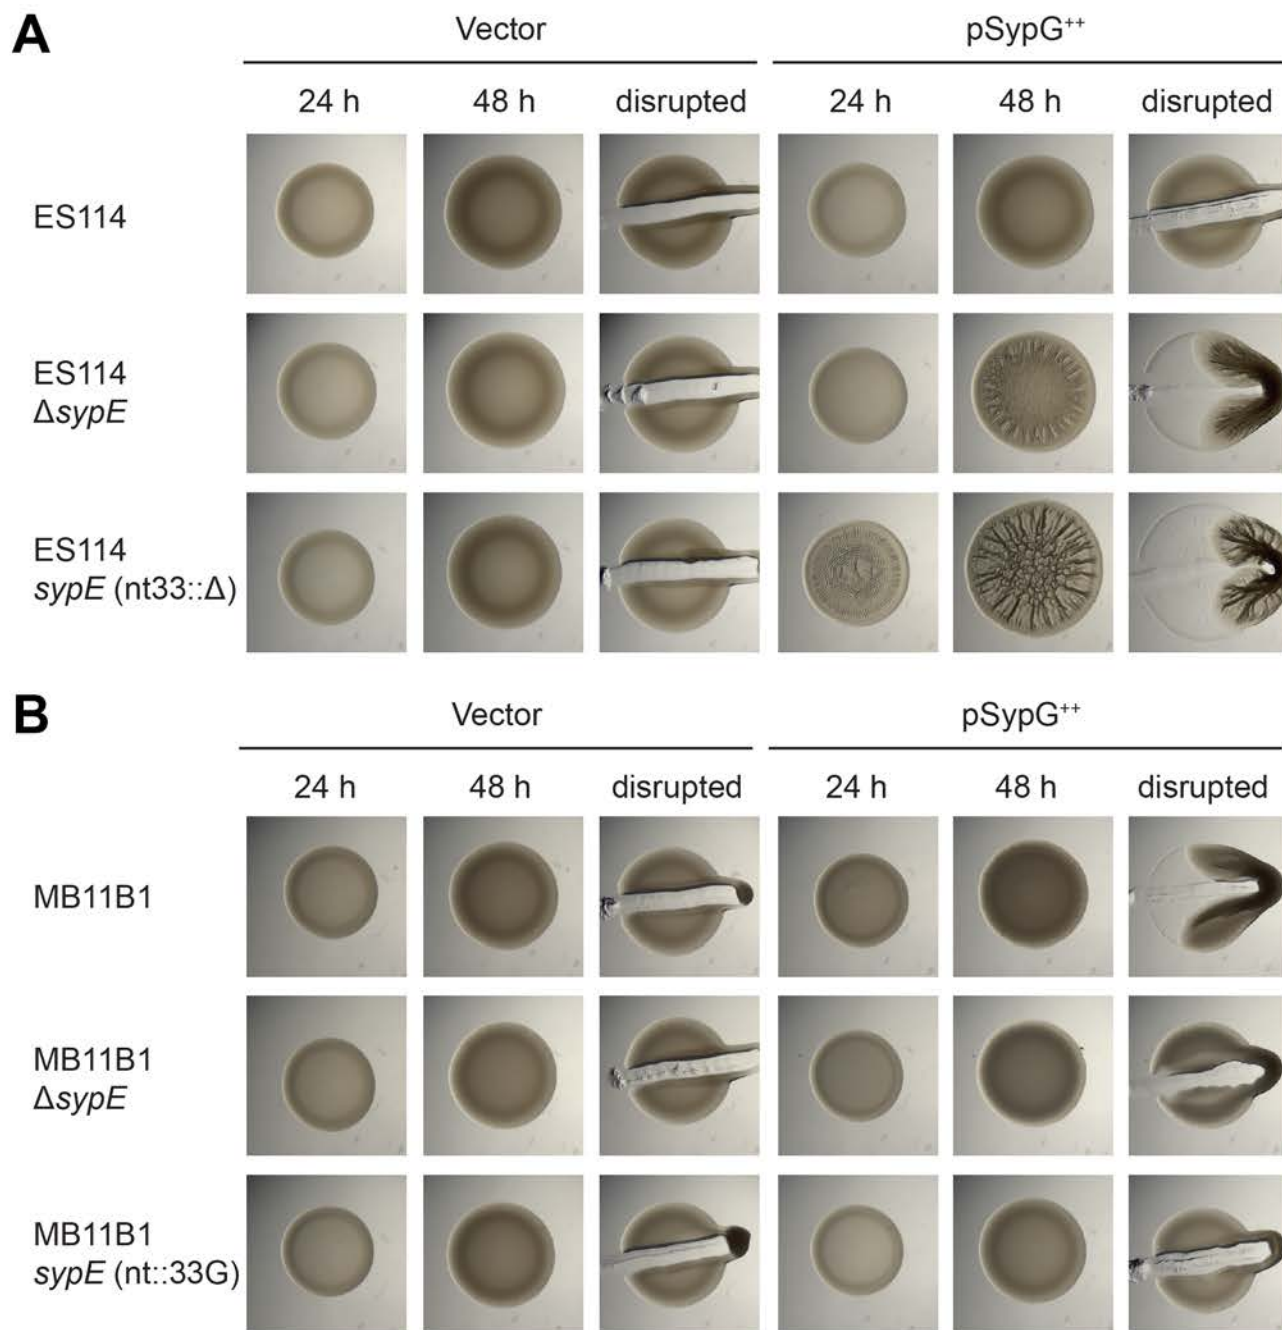

**Figure 8. The MB11B1 *sypE* frameshift leads to an enhanced biofilm phenotype upon SypG overexpression.** Spot assays of strains carrying the pKV69 vector or pEAH73 SypG overexpression plasmid. (A) ES114 strain background. Strains lacking SypE produce a wrinkled colony phenotype upon SypG overexpression. Deletion of nucleotide 33 in *sypE* to mimic the Group A frameshift led to earlier wrinkling and a more pronounced colony biofilm at 48 h. Strains: MJM1104, MJM3455, MJM3418, MJM3419, MJM3364, and MJM3365. (B) Group A strain MB11B1, which naturally carries a -1 frameshift in *sypE*, exhibits a cohesive phenotype at 48 h. Deletion of *sypE* reduces this phenotype, and repairing the frameshift by addition of a guanosine at nucleotide 33 further reduces the cohesiveness of the spot. Strains: MJM3370, MJM3371, MJM3411, MJM3412, MJM3398, and MJM3399.

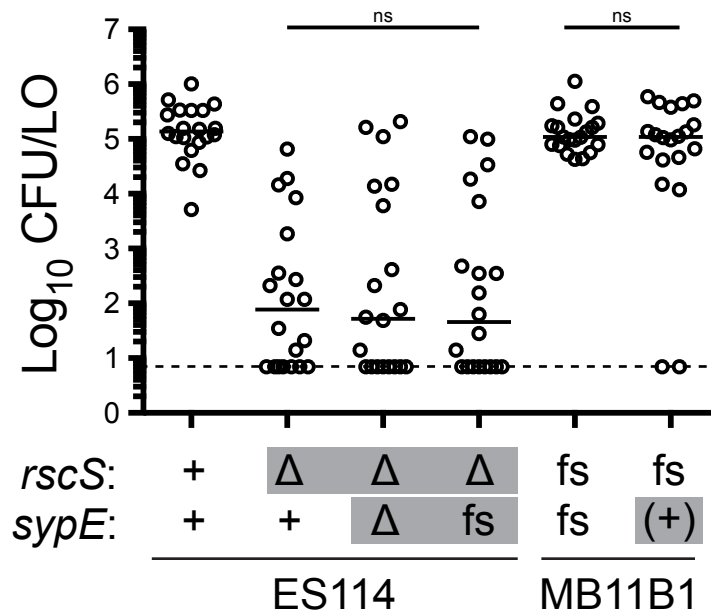

**Figure 9. The *sypE* -1 frameshift allele is not sufficient to affect colonization ability.** The indicated strains were assayed in a single-strain colonization assay. Gray boxes denote alleles distinct from their wild-type background. Frameshift “fs” refers to alleles--relative to an ES114 reference--that lack *rscS* nucleotide A1141, or that lack *sypE* nucleotide G33. The wild-type MB11B1 strain contains natural frameshifts in these loci, and the ES114 nt33::ΔG allele was constructed. Addition back of the nucleotide in MB11B1 *sypE* is denoted as “(+)”. Hatchling squid were inoculated with  $6.8-8.4 \times 10^2$  CFU/ml bacteria (MB11B1 background) or  $4.0-5.4 \times 10^3$  CFU/ml bacteria (ES114 background), washed at 3 h and 24 h, and assayed at 48 h. Each dot represents an individual squid. The limit of detection is represented by the dashed line and the horizontal bars represent the median of each set. Strains are MJM1100, MJM3010, MJM4323, MJM3394, MJM1130, and MJM3397. Statistical comparisons by the Mann-Whitney test, ns not significant.

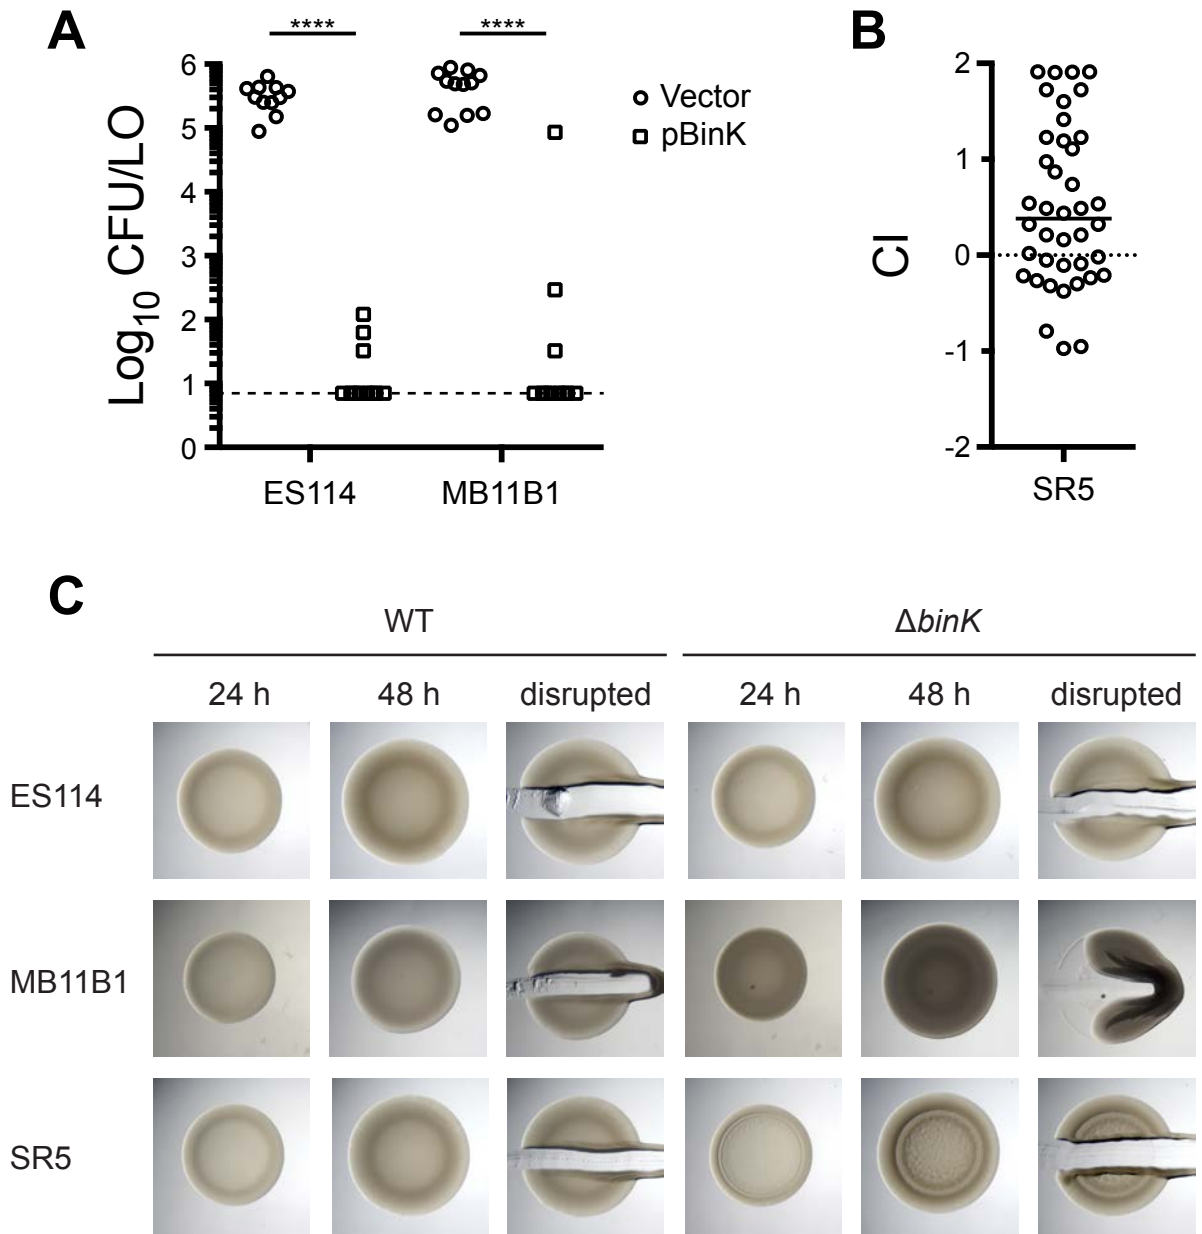

**Figure 10. BinK is active in Groups A, B, and C.** (A) Overexpression of pBinK inhibits colonization in Group A strain MB11B1. Hatchling squid were inoculated with  $3.6\text{-}6.8 \times 10^3$  CFU/ml bacteria, washed at 3 h and 24 h, and assayed at 48 h. Each dot represents an individual squid. The limit of detection is represented by the dashed line and the horizontal bars represent the median of each set. The vector control is pVSV104. Strains are MJM1782, MJM2386, MJM2997, and MJM2998. (B) Deletion of *binK* confers a colonization defect in Group C strain SR5. Strains are MJM1125 and MJM3571; mean inoculum of  $7.2 \times 10^3$  CFU/ml; median competitive index (CI) was 0.38 (i.e., 2.4-fold advantage for the mutant). (C) Deletion of the native *binK* in MB11B1 yielded opaque and cohesive spots, which are stronger phenotypes than we observe in ES114. Strains are MJM1100, MJM2251, MJM1130, MJM3084, MJM2997, and MJM2998. Statistical comparisons by the Mann-Whitney test, \*\*\*\*  $p < 0.0001$ .

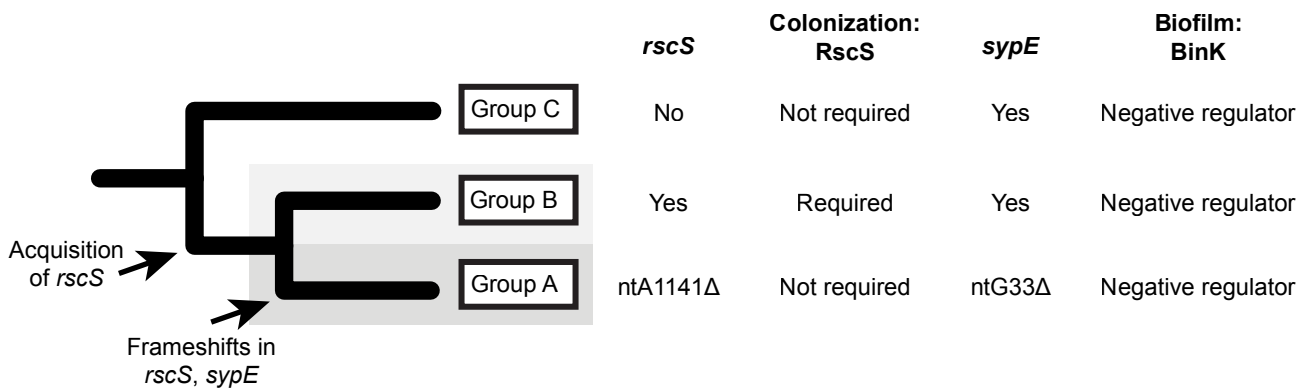

**Figure 11. Summary model of distinct modes of biofilm formation in squid-colonizing *V. fischeri*.** Phylogenetic tree is simplified from Figure 1, and illustrates key features of squid symbionts in the three groups. Shown are divergent aspects (RscS, SypE) and conserved regulation (BinK). In all groups, the *syp* exopolysaccharide locus is required for squid colonization.
